# Supplementary material for: Antioxidant Properties of the Vam3 Derivative of Resveratrol
Source: PubMed Central journal article supplement (PMC6222371; doi:10.3390/molecules23102446), 2018-09-25
Supplement: molecules-23-02446-s001.pdf [file molecules-23-02446-s001.pdf]

Article

# Antioxidant Properties of the Vam3 Derivative of Resveratrol

Seyedmohammad Ahmadi <sup>1</sup>, Tiziana Marino <sup>2</sup>, Mario Prejanò <sup>2</sup>, Nino Russo <sup>2</sup> and Marirosa Toscano <sup>2,\*</sup>

<sup>1</sup> Department of Food Science and Technology, Faculty of Agriculture, University of Zabol, P.O. Box 98615-538, Zabo 98613-35856 1, Iran; sma\_257@yahoo.com

<sup>2</sup> Dipartimento di Chimica e Tecnologie Chimiche, Università della Calabria, Cubo 14C, Via P. Bucci, 87036 Arcavacata di Rende, CS, Italy; tiziana.marino65@unical.it (T.M.); mario.prejano@unical.it (M.P.); nrusso@unical.it (N.R.)

\* Correspondence: m.toscano@unical.it; Tel.: +39-0984-492108

Academic Editor: Susana M. Cardoso

Received: 16 July 2018; Accepted: 20 September 2018; Published: 25 September 2018

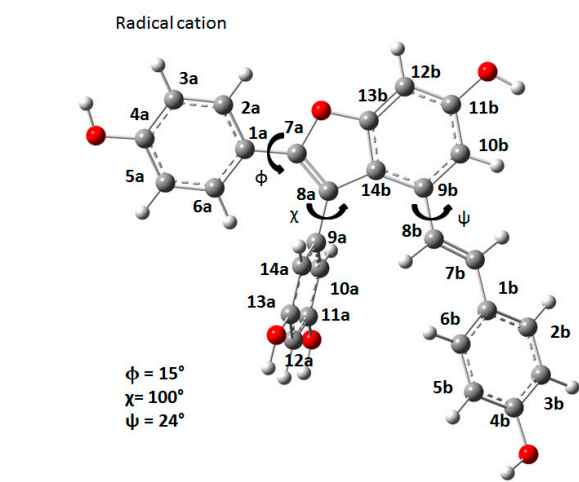

| Bond type | Distance (Å) | Bond type | Distance (Å) |
|-----------|--------------|-----------|--------------|
| 1a-2a     | 1.405        | 1b-2b     | 1.407        |
| 2a-3a     | 1.390        | 2b-3b     | 1.388        |
| 3a-4a     | 1.395        | 3b-4b     | 1.394        |
| 4a-5a     | 1.396        | 4b-5b     | 1.398        |
| 5a-6a     | 1.387        | 5b-6b     | 1.389        |
| 6a-1a     | 1.407        | 6b-1b     | 1.405        |
| 1a-7a     | 1.460        | 1b-7b     | 1.463        |
| 7a-8a     | 1.372        | 7b-8b     | 1.347        |
| 8a-9a     | 1.486        | 8b-9b     | 1.464        |
| 9a-10a    | 1.398        | 9b-10b    | 1.404        |
| 10a-11a   | 1.393        | 10b-11b   | 1.400        |
| 11a-12a   | 1.397        | 11b-12b   | 1.393        |
| 12a-13a   | 1.396        | 12b-13b   | 1.383        |
| 13a-14a   | 1.394        | 13b-14b   | 1.405        |
| 14a-9a    | 1.398        | 14b-9b    | 1.417        |
| 8a-14b    | 1.452        |           |              |

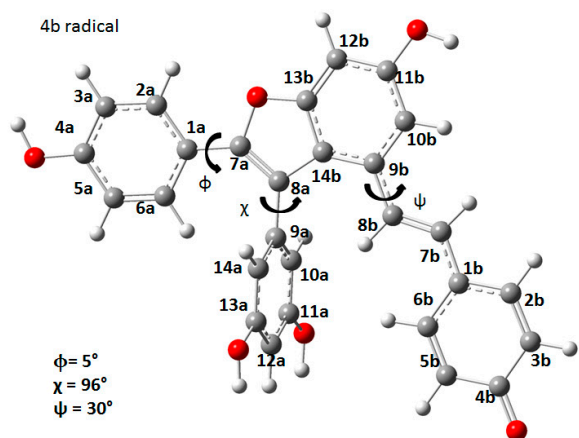

| Bond type | Distance (Å) | Bond type | Distance (Å) | Bond type | Distance (Å) |
|-----------|--------------|-----------|--------------|-----------|--------------|
| 1a-2a     | 1.406        | 1b-2b     | 1.431        | H6a-H14a  | 3.360        |
| 2a-3a     | 1.389        | 2b-3b     | 1.364        | H8b-H14a  | 3.333        |
| 3a-4a     | 1.396        | 3b-4b     | 1.456        | H6a-H10a  | 3.256        |
| 4a-5a     | 1.396        | 4b-5b     | 1.461        | H8b-H10a  | 3.218        |
| 5a-6a     | 1.386        | 5b-6b     | 1.361        |           |              |
| 6a-1a     | 1.408        | 6b-1b     | 1.434        |           |              |
| 1a-7a     | 1.458        | 1b-7b     | 1.426        |           |              |
| 7a-8a     | 1.376        | 7b-8b     | 1.370        |           |              |
| 8a-9a     | 1.487        | 8b-9b     | 1.445        |           |              |
| 9a-10a    | 1.398        | 9b-10b    | 1.412        |           |              |
| 10a-11a   | 1.394        | 10b-11b   | 1.393        |           |              |
| 11a-12a   | 1.397        | 11b-12b   | 1.399        |           |              |
| 12a-13a   | 1.397        | 12b-13b   | 1.380        |           |              |
| 13a-14a   | 1.395        | 13b-14b   | 1.407        |           |              |
| 14a-9a    | 1.398        | 14b-9b    | 1.424        |           |              |
| 8a-14b    | 1.448        |           |              |           |              |

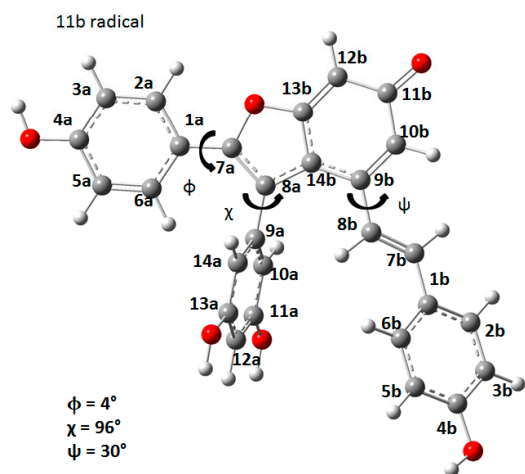

| Bond type | Distance (Å) | Bond type | Distance (Å) | Bond type | Distance (Å) |
|-----------|--------------|-----------|--------------|-----------|--------------|
| 1a-2a     | 1.409        | 1b-2b     | 1.406        | H6a-H14a  | 3.253        |
| 2a-3a     | 1.387        | 2b-3b     | 1.389        | H8b-H14a  | 3.230        |
| 3a-4a     | 1.397        | 3b-4b     | 1.394        | H6a-H10a  | 3.350        |
| 4a-5a     | 1.397        | 4b-5b     | 1.398        | H8b-H10a  | 3.542        |
| 5a-6a     | 1.384        | 5b-6b     | 1.389        |           |              |
| 6a-1a     | 1.410        | 6b-1b     | 1.405        |           |              |
| 1a-7a     | 1.451        | 1b-7b     | 1.464        |           |              |
| 7a-8a     | 1.393        | 7b-8b     | 1.346        |           |              |
| 8a-9a     | 1.487        | 8b-9b     | 1.468        |           |              |
| 9a-10a    | 1.397        | 9b-10b    | 1.377        |           |              |
| 10a-11a   | 1.394        | 10b-11b   | 1.461        |           |              |
| 11a-12a   | 1.397        | 11b-12b   | 1.454        |           |              |
| 12a-13a   | 1.396        | 12b-13b   | 1.361        |           |              |
| 13a-14a   | 1.394        | 13b-14b   | 1.421        |           |              |
| 14a-9a    | 1.398        | 14b-9b    | 1.442        |           |              |
| 8a-14b    | 1.423        |           |              |           |              |

Figure S1. Optimized geometries of radical species of Vam3 and relative geometrical parameters.

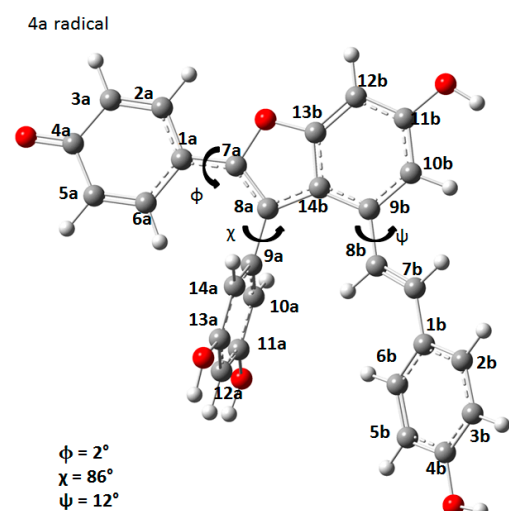

| Bond type | Distance (Å) | Bond type | Distance (Å) | Bond type | Distance (Å) |
|-----------|--------------|-----------|--------------|-----------|--------------|
| 1a-2a     | 1.431        | 1b-2b     | 1.404        | H6a-H14a  | 3.334        |
| 2a-3a     | 1.364        | 2b-3b     | 1.391        | H8b-H14a  | 3.488        |
| 3a-4a     | 1.457        | 3b-4b     | 1.394        | H6a-H10a  | 3.228        |
| 4a-5a     | 1.457        | 4b-5b     | 1.396        | H8b-H10a  | 3.194        |
| 5a-6a     | 1.364        | 5b-6b     | 1.384        |           |              |
| 6a-1a     | 1.430        | 6b-1b     | 1.409        |           |              |
| 1a-7a     | 1.429        | 1b-7b     | 1.461        |           |              |
| 7a-8a     | 1.393        | 7b-8b     | 1.348        |           |              |
| 8a-9a     | 1.486        | 8b-9b     | 1.461        |           |              |
| 9a-10a    | 1.398        | 9b-10b    | 1.401        |           |              |
| 10a-11a   | 1.394        | 10b-11b   | 1.402        |           |              |
| 11a-12a   | 1.397        | 11b-12b   | 1.396        |           |              |
| 12a-13a   | 1.397        | 12b-13b   | 1.379        |           |              |
| 13a-14a   | 1.394        | 13b-14b   | 1.411        |           |              |
| 14a-9a    | 1.397        | 14b-9b    | 1.424        |           |              |
| 8a-14b    | 1.437        |           |              |           |              |

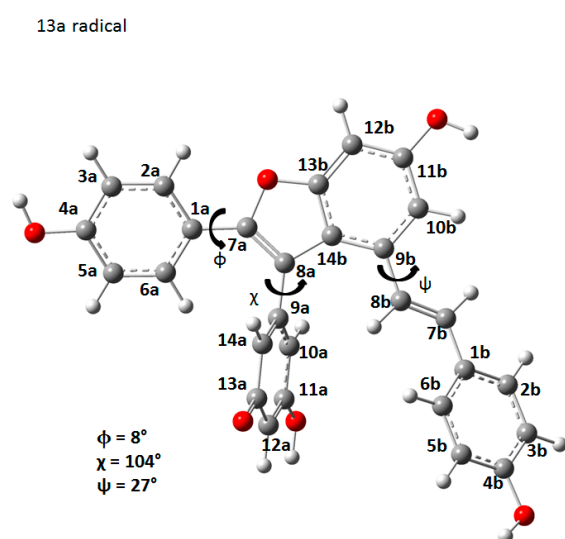

| Bond type | Distance (Å) | Bond type | Distance (Å) | Bond type | Distance (Å) |
|-----------|--------------|-----------|--------------|-----------|--------------|
| 1a-2a     | 1.405        | 1b-2b     | 1.406        | H6a-H14a  | 3.401        |
| 2a-3a     | 1.390        | 2b-3b     | 1.388        | H8b-H14a  | 3.495        |
| 3a-4a     | 1.397        | 3b-4b     | 1.395        | H6a-H10a  | 3.379        |
| 4a-5a     | 1.396        | 4b-5b     | 1.398        | H8b-H10a  | 3.308        |
| 5a-6a     | 1.386        | 5b-6b     | 1.388        |           |              |
| 6a-1a     | 1.407        | 6b-1b     | 1.405        |           |              |
| 1a-7a     | 1.460        | 1b-7b     | 1.463        |           |              |
| 7a-8a     | 1.372        | 7b-8b     | 1.347        |           |              |
| 8a-9a     | 1.484        | 8b-9b     | 1.465        |           |              |
| 9a-10a    | 1.410        | 9b-10b    | 1.403        |           |              |
| 10a-11a   | 1.417        | 10b-11b   | 1.401        |           |              |
| 11a-12a   | 1.372        | 11b-12b   | 1.393        |           |              |
| 12a-13a   | 1.449        | 12b-13b   | 1.373        |           |              |
| 13a-14a   | 1.455        | 13b-14b   | 1.405        |           |              |
| 14a-9a    | 1.383        | 14b-9b    | 1.417        |           |              |
| 8a-14b    | 1.452        |           |              |           |              |

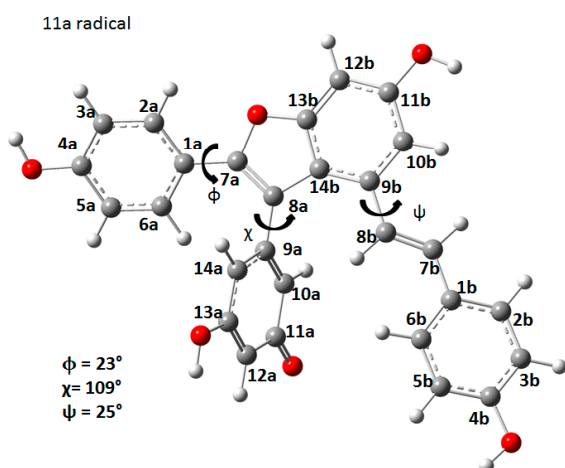

| Bond type | Distance (Å) | Bond type | Distance (Å) | Bond type | Distance (Å) |
|-----------|--------------|-----------|--------------|-----------|--------------|
| 1a-2a     | 1.404        | 1b-2b     | 1.407        | H6a-H14a  | 3.428        |
| 2a-3a     | 1.389        | 2b-3b     | 1.388        | H8b-H14a  | 3.750        |
| 3a-4a     | 1.396        | 3b-4b     | 1.394        | H6a-H10a  | 3.339        |
| 4a-5a     | 1.396        | 4b-5b     | 1.398        | H8b-H10a  | 3.062        |
| 5a-6a     | 1.387        | 5b-6b     | 1.387        |           |              |
| 6a-1a     | 1.406        | 6b-1b     | 1.405        |           |              |
| 1a-7a     | 1.460        | 1b-7b     | 1.462        |           |              |
| 7a-8a     | 1.372        | 7b-8b     | 1.347        |           |              |
| 8a-9a     | 1.484        | 8b-9b     | 1.465        |           |              |
| 9a-10a    | 1.385        | 9b-10b    | 1.403        |           |              |
| 10a-11a   | 1.454        | 10b-11b   | 1.400        |           |              |
| 11a-12a   | 1.449        | 11b-12b   | 1.392        |           |              |
| 12a-13a   | 1.372        | 12b-13b   | 1.382        |           |              |
| 13a-14a   | 1.417        | 13b-14b   | 1.406        |           |              |
| 14a-9a    | 1.408        | 14b-9b    | 1.418        |           |              |
| 8a-14b    | 1.454        |           |              |           |              |

Figure S2. Optimized geometries of radical species of Vam3 and relative geometrical parameters.

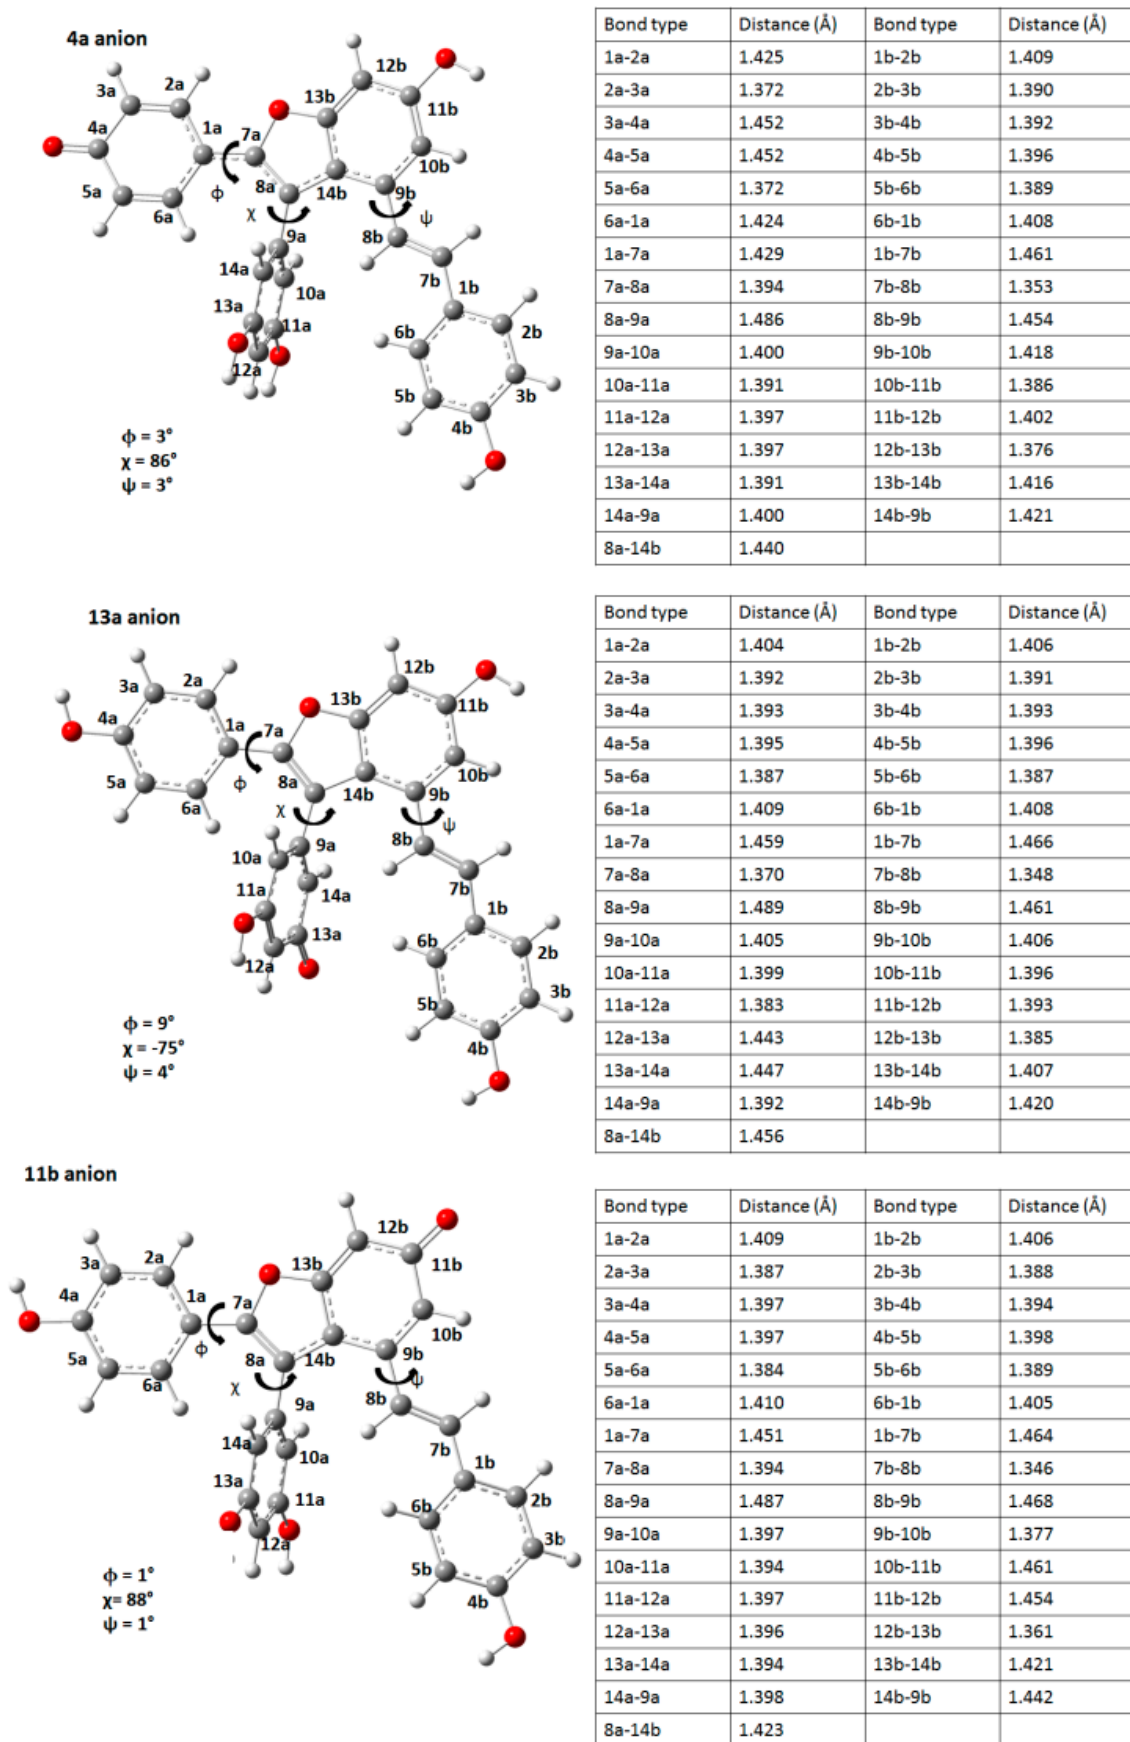

Figure S3. Optimized geometries of anion species of Vam3 and relative geometrical parameters.

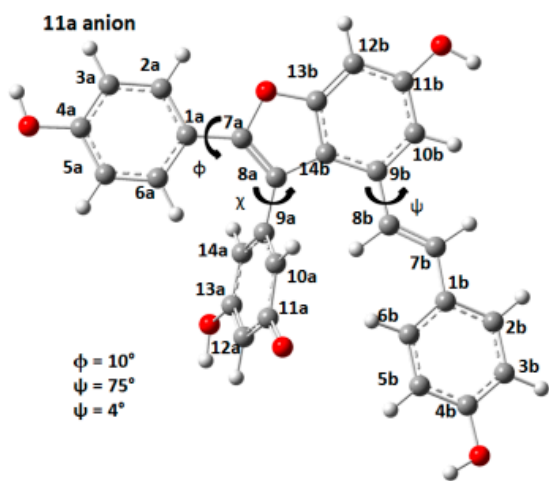

| Bond type | Distance (Å) | Bond type | Distance (Å) |
|-----------|--------------|-----------|--------------|
| 1a-2a     | 1.404        | 1b-2b     | 1.406        |
| 2a-3a     | 1.392        | 2b-3b     | 1.391        |
| 3a-4a     | 1.393        | 3b-4b     | 1.393        |
| 4a-5a     | 1.395        | 4b-5b     | 1.396        |
| 5a-6a     | 1.387        | 5b-6b     | 1.387        |
| 6a-1a     | 1.409        | 6b-1b     | 1.408        |
| 1a-7a     | 1.459        | 1b-7b     | 1.466        |
| 7a-8a     | 1.370        | 7b-8b     | 1.348        |
| 8a-9a     | 1.489        | 8b-9b     | 1.461        |
| 9a-10a    | 1.391        | 9b-10b    | 1.406        |
| 10a-11a   | 1.447        | 10b-11b   | 1.396        |
| 11a-12a   | 1.443        | 11b-12b   | 1.393        |
| 12a-13a   | 1.383        | 12b-13b   | 1.385        |
| 13a-14a   | 1.399        | 13b-14b   | 1.407        |
| 14a-9a    | 1.405        | 14b-9b    | 1.420        |
| 8a-14b    | 1.456        |           |              |

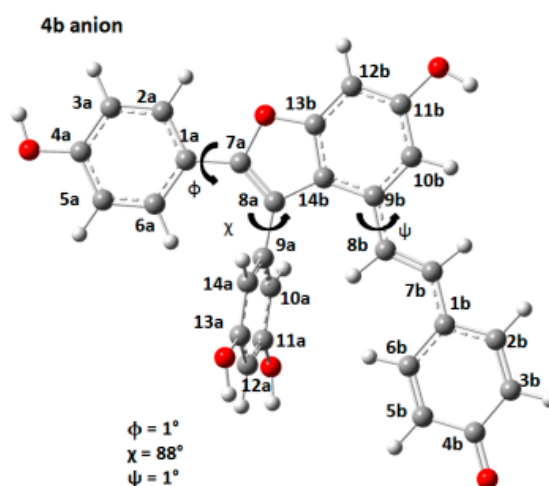

| Bond type | Distance (Å) | Bond type | Distance (Å) |
|-----------|--------------|-----------|--------------|
| 1a-2a     | 1.407        | 1b-2b     | 1.424        |
| 2a-3a     | 1.391        | 2b-3b     | 1.373        |
| 3a-4a     | 1.393        | 3b-4b     | 1.451        |
| 4a-5a     | 1.394        | 4b-5b     | 1.456        |
| 5a-6a     | 1.388        | 5b-6b     | 1.370        |
| 6a-1a     | 1.409        | 6b-1b     | 1.425        |
| 1a-7a     | 1.457        | 1b-7b     | 1.427        |
| 7a-8a     | 1.373        | 7b-8b     | 1.371        |
| 8a-9a     | 1.487        | 8b-9b     | 1.441        |
| 9a-10a    | 1.398        | 9b-10b    | 1.406        |
| 10a-11a   | 1.392        | 10b-11b   | 1.396        |
| 11a-12a   | 1.396        | 11b-12b   | 1.396        |
| 12a-13a   | 1.396        | 12b-13b   | 1.386        |
| 13a-14a   | 1.392        | 13b-14b   | 1.404        |
| 14a-9a    | 1.398        | 14b-9b    | 1.433        |
| 8a-14b    | 1.451        |           |              |

**Figure S4.** Optimized geometries of anion species of Vam3 and relative geometrical parameters.

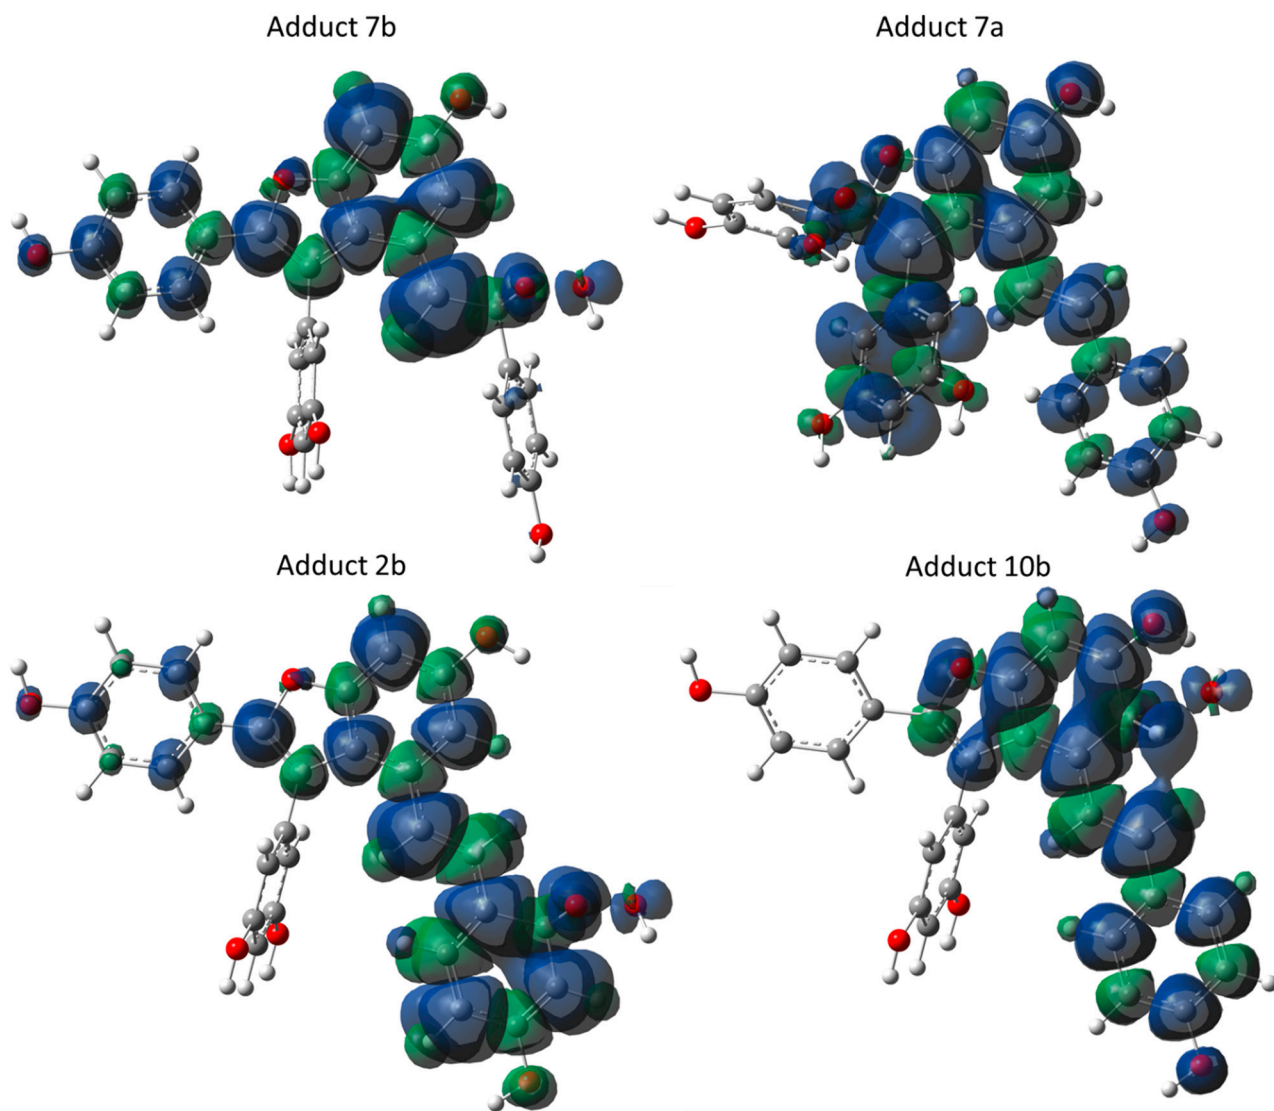

Figure S5. Spin densities of adducts obtained by exergonic radical adduct formation mechanism.

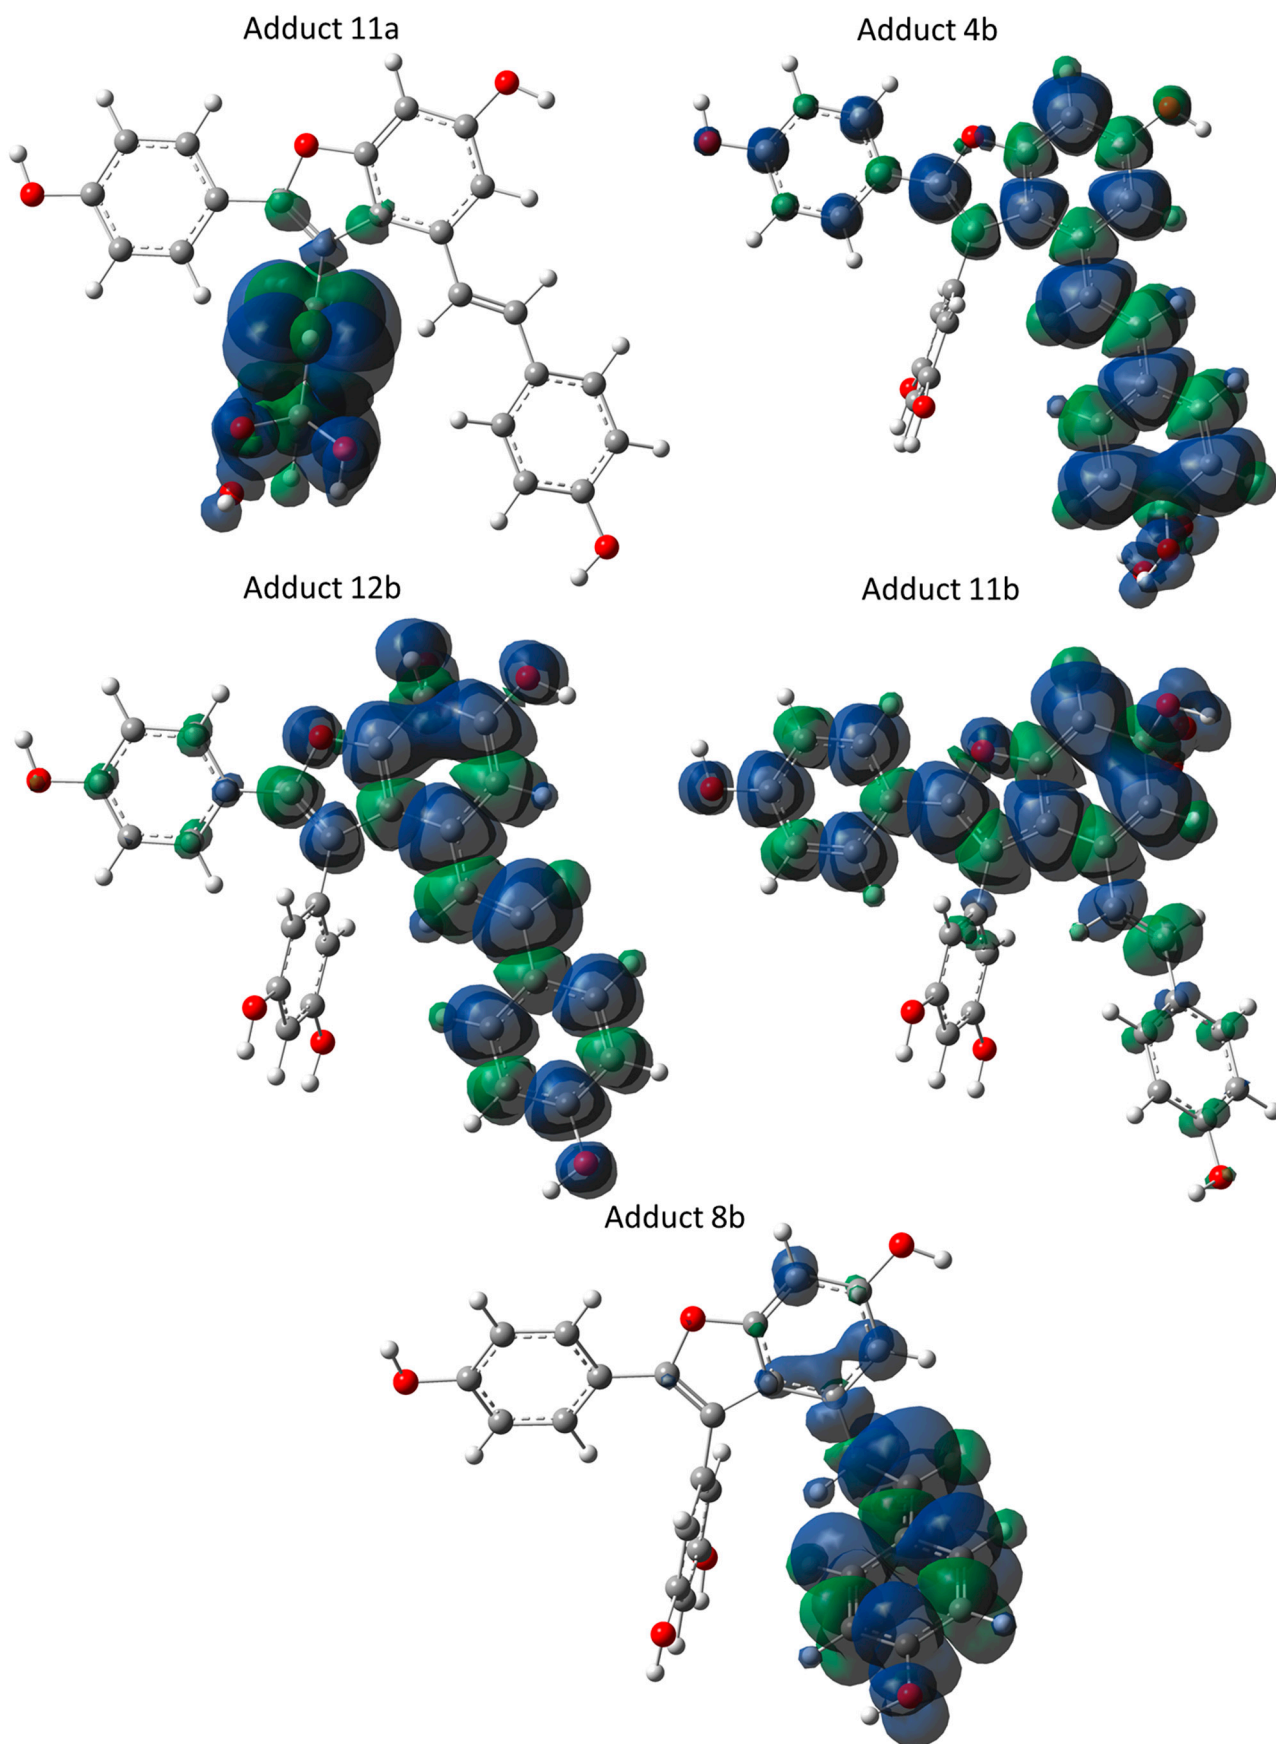

Figure S6. Spin densities of adducts obtained by exergonic radical adduct formation mechanism.

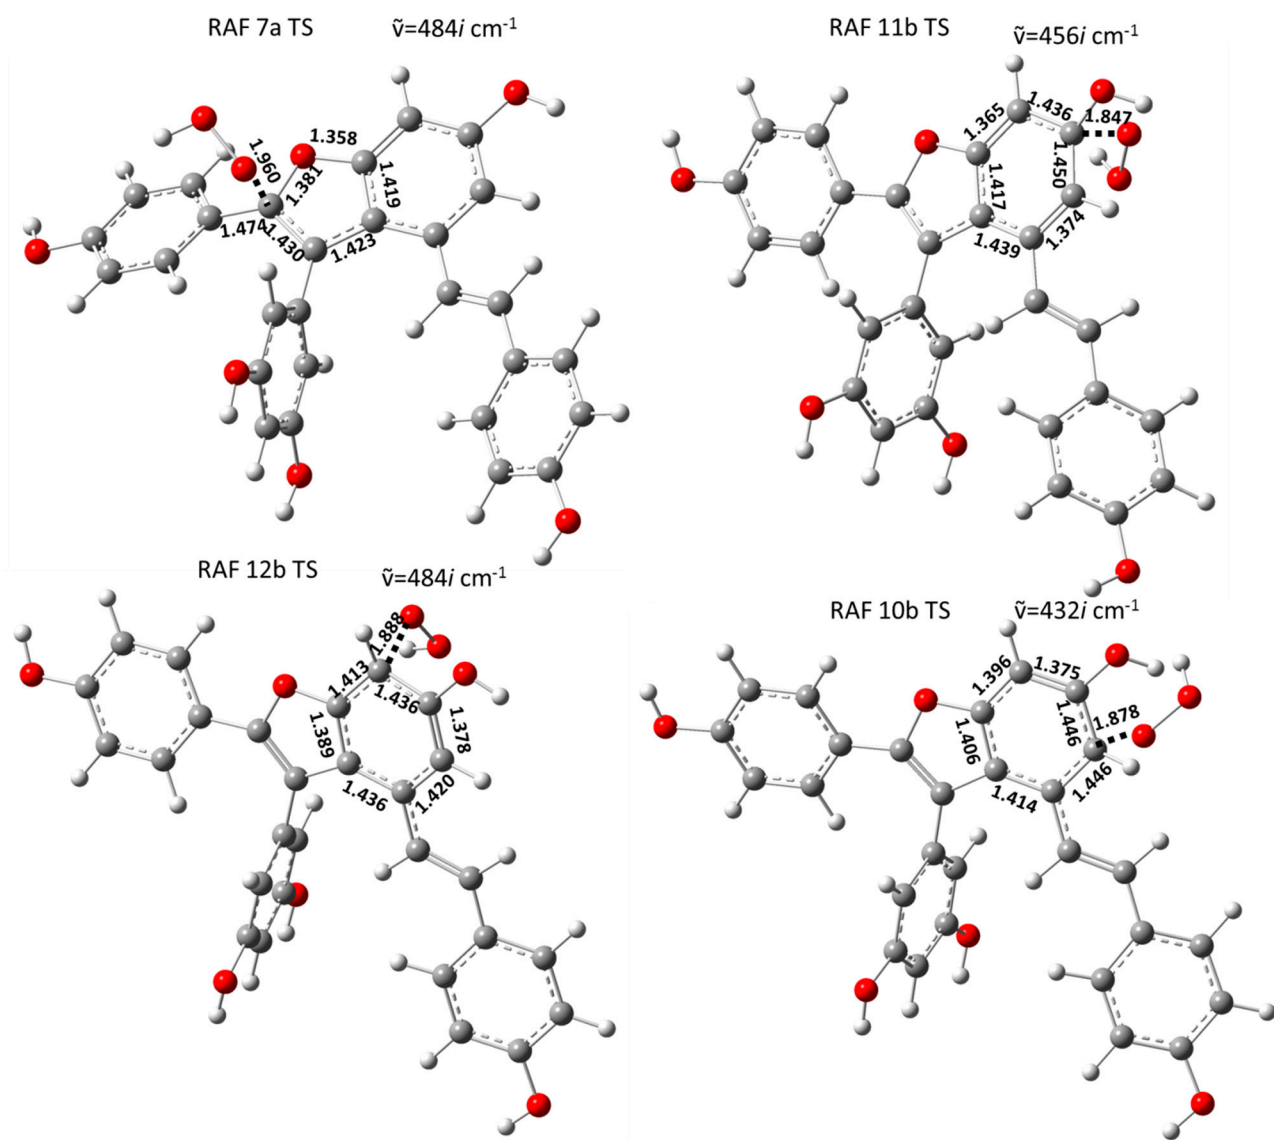

**Figure S5.** Optimized geometries of RAF Transition State species of Vam3 and relative geometrical parameters.



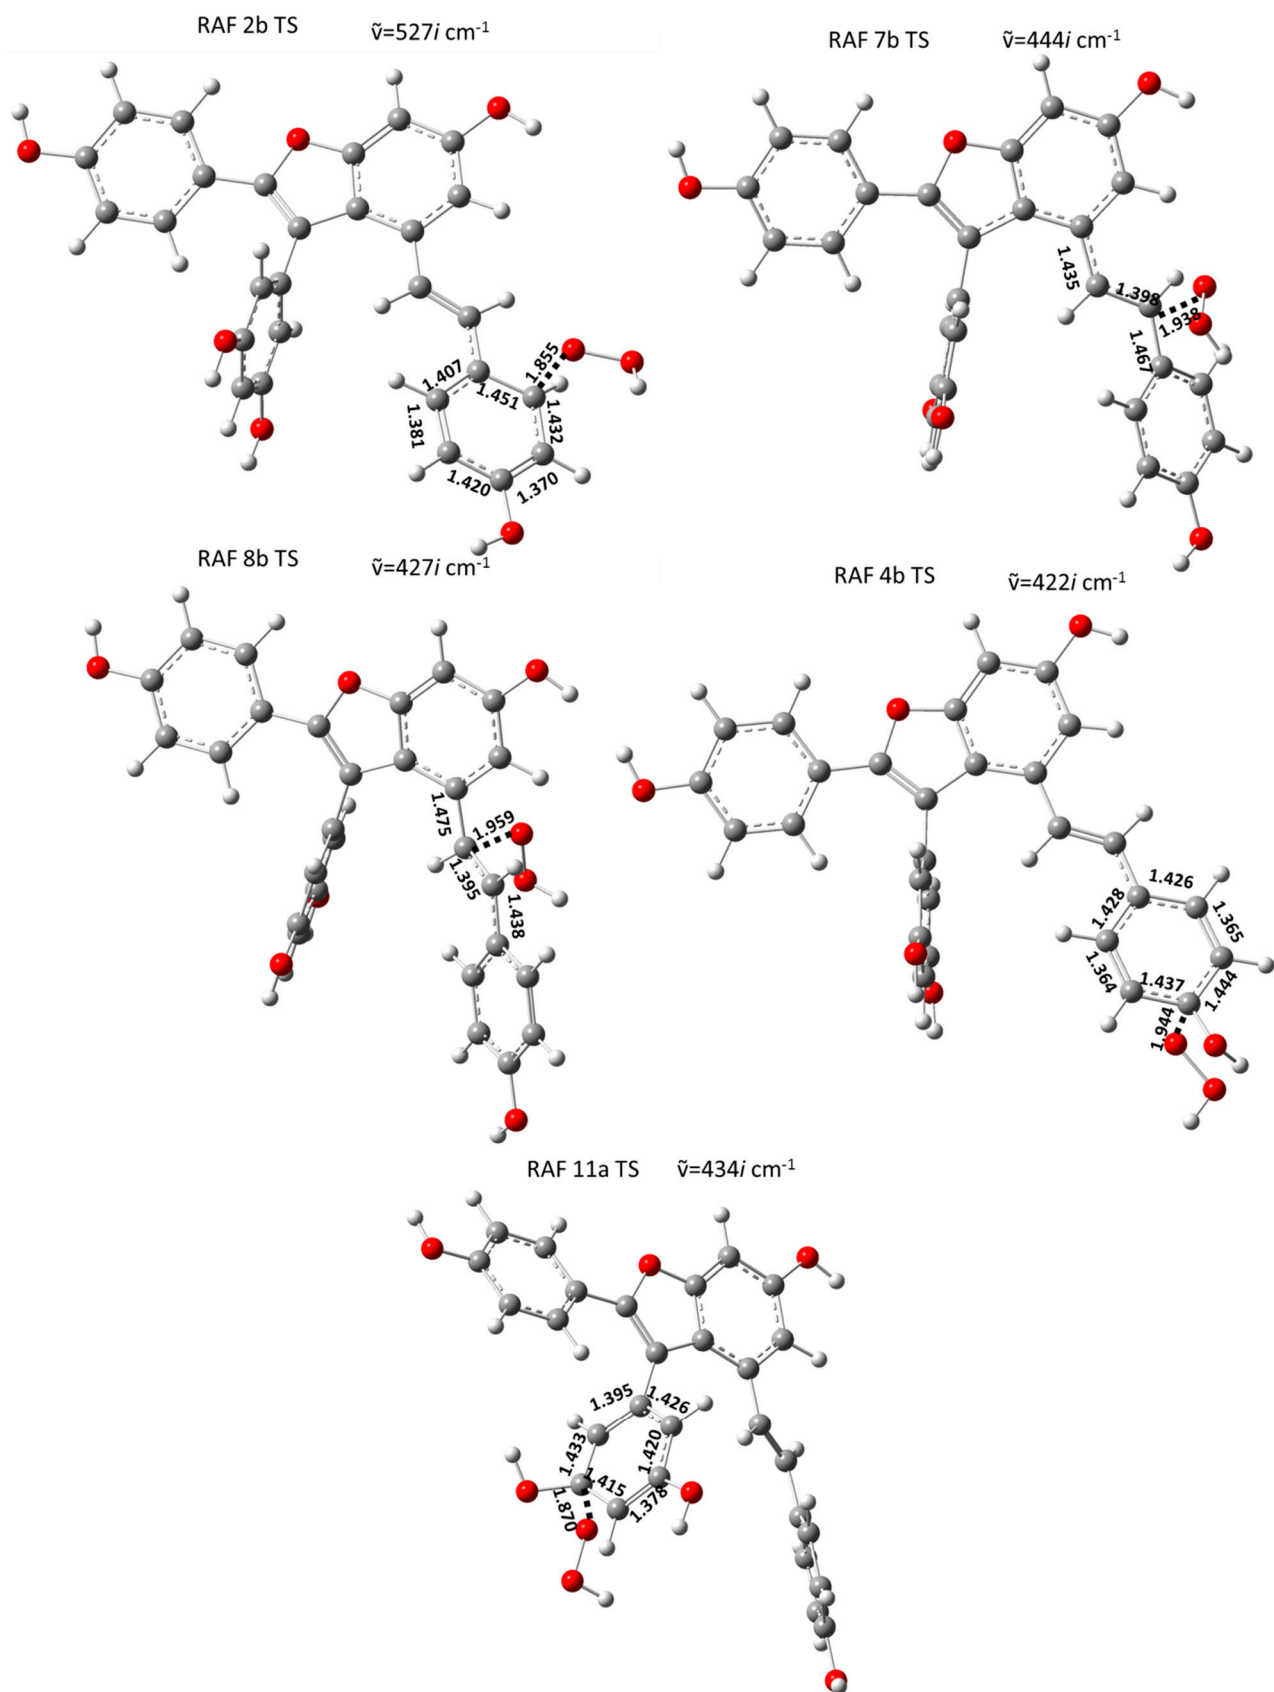

**Figure S6.** Optimized geometries of RAF Transition State species of Vam3 and relative geometrical parameters.

## Cartesian coordinates 4a HAT TS

|   |             |             |             |
|---|-------------|-------------|-------------|
| C | 0.90937200  | 2.82240100  | 0.08728100  |
| C | -0.08071600 | 1.81789800  | 0.11529000  |
| C | -1.44859700 | 2.20995700  | 0.15174100  |
| C | -1.70530900 | 3.58807000  | 0.16921500  |
| C | -0.68423400 | 4.54641100  | 0.13465400  |
| C | 0.66238900  | 4.17923400  | 0.09217100  |
| C | 1.98700700  | 0.88929800  | 0.03973000  |
| C | 0.63644800  | 0.57090200  | 0.07977700  |
| H | -2.73105300 | 3.93261300  | 0.24797900  |
| H | 1.44969300  | 4.92005900  | 0.07407700  |
| C | 3.20745600  | 0.12935200  | -0.01186000 |
| C | 4.45655300  | 0.80163600  | -0.01050900 |
| C | 3.22148100  | -1.28887900 | -0.07108800 |
| C | 5.64763900  | 0.11459800  | -0.06092500 |
| H | 4.46961900  | 1.88246600  | 0.03242700  |
| C | 4.40438400  | -1.98429800 | -0.12397000 |
| H | 2.29056900  | -1.83654500 | -0.07813600 |
| C | 5.65551700  | -1.30774400 | -0.11921000 |
| H | 6.59179600  | 0.64491000  | -0.05795100 |
| H | 4.41571200  | -3.06644900 | -0.17135400 |
| C | 0.04545800  | -0.79275200 | 0.08182200  |
| C | -0.13739600 | -1.47179400 | 1.29041300  |
| C | -0.34053300 | -1.38079600 | -1.12511900 |
| C | -0.70214800 | -2.74672600 | 1.28168900  |
| H | 0.15957700  | -1.02963000 | 2.23255100  |
| C | -0.90477500 | -2.65585400 | -1.11837900 |
| H | -0.20786600 | -0.86532400 | -2.06724800 |
| C | -1.08796300 | -3.34727300 | 0.08131200  |
| H | -1.52499000 | -4.34265200 | 0.08042100  |
| C | -2.52671800 | 1.22465900  | 0.18488300  |
| H | -2.24142500 | 0.23218700  | 0.50934000  |
| C | -3.80736200 | 1.44875300  | -0.17406800 |
| H | -4.07320900 | 2.42457200  | -0.57363600 |
| C | -4.91419500 | 0.49651600  | -0.12294500 |
| C | -4.81879500 | -0.77834200 | 0.46975100  |
| C | -6.15085700 | 0.85405900  | -0.68363200 |
| C | -5.89487500 | -1.64914200 | 0.49011400  |
| H | -3.88965000 | -1.09228500 | 0.93004000  |

|   |             |             |             |
|---|-------------|-------------|-------------|
| C | -7.23936600 | -0.01158100 | -0.66963200 |
| H | -6.26150800 | 1.83034500  | -1.14410300 |
| C | -7.11350800 | -1.27028400 | -0.08254200 |
| H | -5.81650600 | -2.62556400 | 0.95292400  |
| H | -8.18291900 | 0.29238800  | -1.11319100 |
| O | 6.74662300  | -2.01717800 | -0.16764100 |
| O | -1.25991200 | -3.18582100 | -2.32530200 |
| O | -0.85703200 | -3.36821500 | 2.48879200  |
| O | -0.95396200 | 5.88522600  | 0.15878300  |
| O | -8.13884900 | -2.17230300 | -0.02955000 |
| O | 2.14624100  | 2.26480000  | 0.04639100  |
| H | -1.90591200 | 6.02721500  | 0.19099600  |
| H | -8.92503800 | -1.80076600 | -0.44361900 |
| H | -1.64996000 | -4.05799900 | -2.20560000 |
| H | -1.22607600 | -4.24902400 | 2.36541900  |
| H | 7.72623100  | -1.48726900 | -0.18085300 |
| O | 8.95065000  | -1.05340400 | -0.21636300 |
| O | 8.87496900  | 0.34815600  | -0.15653800 |
| H | 9.80494300  | 0.60697000  | -0.22484200 |

## Cartesian coordinates 11b HAT TS

|   |             |             |             |
|---|-------------|-------------|-------------|
| C | 1.31651300  | 2.60537400  | -0.12855200 |
| C | 0.51540600  | 1.43970600  | -0.14344700 |
| C | -0.90828100 | 1.58835600  | -0.21331700 |
| C | -1.40162400 | 2.88588500  | -0.27227000 |
| C | -0.56683200 | 4.03944700  | -0.22604200 |
| C | 0.84271500  | 3.89040900  | -0.15235300 |
| C | 2.70617300  | 0.88832100  | -0.03075200 |
| C | 1.43125700  | 0.34082900  | -0.07587900 |
| H | -2.46422900 | 3.05671300  | -0.38833200 |
| H | 1.48512300  | 4.75982200  | -0.12207600 |
| C | 4.04948100  | 0.34434800  | 0.05259400  |
| C | 5.15664100  | 1.21323100  | -0.00643400 |
| C | 4.30420200  | -1.03472300 | 0.20008600  |
| C | 6.45401900  | 0.72951900  | 0.07231700  |
| H | 4.99267100  | 2.27661100  | -0.11594200 |
| C | 5.59801600  | -1.52061700 | 0.28065800  |
| H | 3.48292800  | -1.73376500 | 0.25712500  |
| C | 6.68219700  | -0.64144300 | 0.21571800  |

|   |             |             |             |
|---|-------------|-------------|-------------|
| H | 7.29155500  | 1.41896600  | 0.02251600  |
| H | 5.78773100  | -2.58062000 | 0.39623200  |
| C | 1.09129500  | -1.10626900 | -0.04791300 |
| C | 0.75554300  | -1.71343600 | 1.16460800  |
| C | 1.09864900  | -1.84858600 | -1.23265200 |
| C | 0.43056400  | -3.06904000 | 1.18719700  |
| H | 0.73891600  | -1.14957000 | 2.08801000  |
| C | 0.77367300  | -3.20383200 | -1.19450800 |
| H | 1.35611400  | -1.39133500 | -2.17921800 |
| C | 0.43964100  | -3.82322900 | 0.01162400  |
| H | 0.18906300  | -4.88079500 | 0.03576700  |
| C | -1.79448600 | 0.42464900  | -0.25190400 |
| H | -1.34961000 | -0.49981600 | -0.59924700 |
| C | -3.08768400 | 0.42847600  | 0.12878500  |
| H | -3.49777500 | 1.33998800  | 0.55634000  |
| C | -4.02642600 | -0.68993100 | 0.06372500  |
| C | -3.76758500 | -1.88183100 | -0.63498500 |
| C | -5.26719000 | -0.58194500 | 0.71845700  |
| C | -4.69380000 | -2.91545600 | -0.66526600 |
| H | -2.83686000 | -2.00109500 | -1.17682200 |
| C | -6.20053900 | -1.60863700 | 0.69731800  |
| H | -5.49976500 | 0.33029400  | 1.25773200  |
| C | -5.91504000 | -2.78403200 | 0.00325300  |
| H | -4.47599300 | -3.82335200 | -1.22097700 |
| H | -7.15212700 | -1.51377100 | 1.20598700  |
| O | 7.93268500  | -1.17780100 | 0.29902400  |
| O | 0.79843900  | -3.88532700 | -2.37956900 |
| O | 0.11450800  | -3.61370900 | 2.39860200  |
| O | -1.06207800 | 5.24987500  | -0.28287900 |
| O | -6.86541100 | -3.76785000 | 0.00295800  |
| O | 2.63639500  | 2.26205700  | -0.06668300 |
| H | 8.59536200  | -0.48048100 | 0.24700700  |
| H | -0.13612300 | -4.53750200 | 2.29464100  |
| H | -2.12704700 | 5.29847700  | 0.01578100  |
| H | 0.57333000  | -4.81038100 | -2.23587200 |
| H | -6.56618800 | -4.51098700 | -0.53120400 |
| O | -3.31904400 | 5.36190000  | 0.54491400  |
| O | -3.97763100 | 6.35762600  | -0.19178100 |
| H | -4.54896800 | 6.76518400  | 0.47547700  |

Cartesian coordinates 13a HAT TS

|   |             |             |             |
|---|-------------|-------------|-------------|
| C | 1.07214900  | 3.13820300  | -0.10297400 |
| C | 0.16142500  | 2.06883200  | -0.05862400 |
| C | -1.21908600 | 2.34658400  | -0.21874400 |
| C | -1.57803700 | 3.69291500  | -0.38029000 |
| C | -0.63443600 | 4.72834600  | -0.38783800 |
| C | 0.72807400  | 4.46906300  | -0.25661300 |
| C | 2.27778700  | 1.30827600  | 0.18738600  |
| C | 0.97470800  | 0.88257500  | 0.13837400  |
| H | -2.62020600 | 3.94086600  | -0.55389600 |
| H | 1.46021800  | 5.26429900  | -0.28649300 |
| C | 3.56544800  | 0.64003500  | 0.35529500  |
| C | 4.73755600  | 1.24499000  | -0.12689500 |
| C | 3.68558300  | -0.60291200 | 1.00065600  |
| C | 5.97469700  | 0.62611200  | 0.00697800  |
| H | 4.67546000  | 2.20774600  | -0.61749300 |
| C | 4.91803400  | -1.22865200 | 1.13590700  |
| H | 2.80946200  | -1.08147600 | 1.41669300  |
| C | 6.07059900  | -0.61695800 | 0.63509600  |
| H | 6.86615700  | 1.11160000  | -0.37895800 |
| H | 5.00765700  | -2.17701800 | 1.65268400  |
| C | 0.51763900  | -0.52372500 | 0.25320700  |
| C | -0.19405300 | -0.93857100 | 1.38499500  |
| C | 0.79815900  | -1.44272000 | -0.75719400 |
| C | -0.61071000 | -2.27771000 | 1.51153400  |
| H | -0.43726600 | -0.24088400 | 2.17646000  |
| C | 0.41610500  | -2.80513600 | -0.61477400 |
| H | 1.31942400  | -1.13778700 | -1.65329400 |
| C | -0.30179600 | -3.20843400 | 0.53718900  |
| H | -0.58406200 | -4.25165800 | 0.62861900  |
| C | -2.22128500 | 1.27885800  | -0.25730600 |
| H | -1.85558300 | 0.30715500  | -0.56745900 |
| C | -3.52260500 | 1.40927800  | 0.06501900  |
| H | -3.86664900 | 2.36238600  | 0.46053500  |
| C | -4.55450400 | 0.37500900  | -0.02031400 |
| C | -4.37951800 | -0.83633700 | -0.71105200 |
| C | -5.79513000 | 0.58483800  | 0.60810900  |
| C | -5.38349500 | -1.79426200 | -0.75512500 |
| H | -3.45264800 | -1.03211100 | -1.23690800 |

|   |             |             |             |
|---|-------------|-------------|-------------|
| C | -6.80693600 | -0.36472900 | 0.57213000  |
| H | -5.96506100 | 1.51373600  | 1.14286100  |
| C | -6.60240600 | -1.56365100 | -0.11043900 |
| H | -5.22527700 | -2.71892600 | -1.30290900 |
| H | -7.75727700 | -0.19232300 | 1.06254300  |
| O | 7.25522400  | -1.27749400 | 0.79799200  |
| O | 0.70020400  | -3.69840900 | -1.53118500 |
| O | -1.30034500 | -2.58712400 | 2.64631100  |
| O | -1.00231800 | 6.03768200  | -0.55361200 |
| O | -7.62787400 | -2.46859600 | -0.12441000 |
| O | 2.34729600  | 2.68142700  | 0.03535300  |
| H | -1.95970800 | 6.09790500  | -0.63482600 |
| H | -7.37492700 | -3.24142300 | -0.64027500 |
| H | -1.55178400 | -3.51723200 | 2.63613300  |
| H | 7.97699300  | -0.75385300 | 0.43382500  |
| H | 1.77359600  | -3.67094800 | -1.95387600 |
| O | 2.98626500  | -3.73912300 | -2.12706800 |
| O | 3.40326900  | -2.42723400 | -1.93375300 |
| H | 4.10391900  | -2.49980500 | -1.26315800 |

Cartesian coordinates 11a HAT TS

|   |             |             |             |
|---|-------------|-------------|-------------|
| C | 1.66798200  | 2.91260100  | 0.31559300  |
| C | 0.65396900  | 1.94517200  | 0.18366800  |
| C | -0.69905300 | 2.37845600  | 0.23254100  |
| C | -0.91713600 | 3.74666800  | 0.46537600  |
| C | 0.12824700  | 4.66407300  | 0.60577000  |
| C | 1.46204200  | 4.26172900  | 0.52454500  |
| C | 2.69534300  | 0.98770400  | -0.02385100 |
| C | 1.35073600  | 0.69383100  | -0.04586900 |
| H | -1.93589400 | 4.10532100  | 0.56820700  |
| H | 2.27339200  | 4.96923900  | 0.62667600  |
| C | 3.90869100  | 0.19764200  | -0.17395600 |
| C | 5.11761700  | 0.83019900  | -0.51412300 |
| C | 3.92733200  | -1.19574800 | 0.02979600  |
| C | 6.28942000  | 0.10200000  | -0.66419100 |
| H | 5.13332700  | 1.90162900  | -0.66518100 |
| C | 5.09549600  | -1.92670100 | -0.11808400 |
| H | 3.02470800  | -1.71033600 | 0.32785600  |
| C | 6.28270700  | -1.28188200 | -0.47042600 |
| H | 7.21120000  | 0.60956300  | -0.93287500 |

|   |             |             |             |
|---|-------------|-------------|-------------|
| H | 5.10697400  | -2.99691000 | 0.04765300  |
| C | 0.76859400  | -0.64612700 | -0.30653500 |
| C | 0.09780600  | -1.34682900 | 0.69149200  |
| C | 0.85870400  | -1.18824700 | -1.59782600 |
| C | -0.49116500 | -2.61146500 | 0.41072100  |
| H | 0.01381600  | -0.94390400 | 1.69348000  |
| C | 0.27214600  | -2.43378400 | -1.88290100 |
| H | 1.36439200  | -0.65278300 | -2.39089200 |
| C | -0.38588400 | -3.14668600 | -0.89865100 |
| H | -0.83316300 | -4.11537700 | -1.09420400 |
| C | -1.81068000 | 1.44977000  | 0.05215400  |
| H | -1.57935000 | 0.40503900  | 0.21285600  |
| C | -3.06596100 | 1.77935600  | -0.31959100 |
| H | -3.28138200 | 2.81364900  | -0.57763100 |
| C | -4.20018900 | 0.87017400  | -0.45762600 |
| C | -4.18872500 | -0.45815500 | 0.00604900  |
| C | -5.37860600 | 1.32804600  | -1.07632100 |
| C | -5.28849600 | -1.28746100 | -0.15684600 |
| H | -3.31764000 | -0.85175200 | 0.51529500  |
| C | -6.48525800 | 0.50851500  | -1.24481600 |
| H | -5.42149300 | 2.35046800  | -1.43761000 |
| C | -6.44228900 | -0.80846800 | -0.78575600 |
| H | -5.25453100 | -2.30700100 | 0.21606600  |
| H | -7.38595300 | 0.87087400  | -1.72515700 |
| O | 7.40232900  | -2.05108300 | -0.60347000 |
| O | 0.40195700  | -2.88267500 | -3.16539800 |
| O | -1.14035200 | -3.28885700 | 1.31949000  |
| O | -0.10110300 | 5.99357000  | 0.83737700  |
| O | -7.55546000 | -1.57952200 | -0.96840100 |
| O | 2.89518700  | 2.33592100  | 0.19167800  |
| H | -1.04897100 | 6.15725600  | 0.87998400  |
| H | -7.40808100 | -2.45794400 | -0.60183800 |
| H | 8.15642500  | -1.49744600 | -0.83276500 |
| H | -0.03446200 | -3.73641500 | -3.25941100 |
| O | -0.40003800 | -2.84329200 | 3.54034800  |
| O | -1.52093000 | -2.99108100 | 4.36952700  |
| H | -1.13587500 | -3.38866700 | 5.16445700  |
| H | -0.84049900 | -3.01466400 | 2.41381200  |

### Cartesian coordinates 4b HAT TS

|   |             |             |             |
|---|-------------|-------------|-------------|
| C | -2.63301112 | 2.78884232  | -0.10757714 |
| C | -1.44563412 | 2.03912832  | -0.03908714 |
| C | -0.21000512 | 2.73107132  | 0.03440086  |
| C | -0.27104312 | 4.13411732  | 0.02831886  |
| C | -1.47860812 | 4.83516632  | -0.05539014 |
| C | -2.70150812 | 4.16967532  | -0.12365414 |
| C | -3.23914412 | 0.66164032  | -0.13221314 |
| C | -1.86947412 | 0.65026132  | -0.05932314 |
| H | 0.64821188  | 4.70203332  | 0.12783586  |
| H | -3.63701412 | 4.70967632  | -0.17482214 |
| C | -4.27350512 | -0.36707668 | -0.17882314 |
| C | -5.60994812 | -0.02814868 | 0.09017786  |
| C | -3.98763312 | -1.70719768 | -0.49762214 |
| C | -6.61578612 | -0.98646268 | 0.05613186  |
| H | -5.86071312 | 0.99643132  | 0.33110186  |
| C | -4.98782812 | -2.66701968 | -0.53331114 |
| H | -2.97424212 | -2.00245368 | -0.73109714 |
| C | -6.30833212 | -2.31183668 | -0.25334714 |
| H | -7.64129912 | -0.70078368 | 0.27203186  |
| H | -4.76175412 | -3.69632968 | -0.78387914 |
| C | -1.00119212 | -0.55342868 | 0.01647586  |
| C | -0.31905912 | -0.99733668 | -1.12113314 |
| C | -0.85773312 | -1.23094368 | 1.23078886  |
| C | 0.50105888  | -2.12056268 | -1.03758614 |
| H | -0.41446912 | -0.48010168 | -2.06696114 |
| C | -0.03554512 | -2.35460168 | 1.29960886  |
| H | -1.37712012 | -0.89838168 | 2.11996586  |
| C | 0.64867688  | -2.80768668 | 0.16988986  |
| H | 1.28665088  | -3.68617068 | 0.22836386  |
| C | 1.06146288  | 2.01421232  | 0.13254286  |
| H | 0.98566188  | 0.98201532  | 0.44964086  |
| C | 2.28020388  | 2.51602632  | -0.14992614 |
| H | 2.35157988  | 3.53412032  | -0.52536814 |
| C | 3.56407388  | 1.82553532  | -0.03721914 |
| C | 3.70451288  | 0.51815232  | 0.46260686  |
| C | 4.73663988  | 2.48460832  | -0.44891114 |
| C | 4.94530788  | -0.09702668 | 0.54137986  |
| H | 2.83260788  | -0.03134468 | 0.79676786  |

|   |             |             |             |
|---|-------------|-------------|-------------|
| C | 5.98459588  | 1.88092932  | -0.37604914 |
| H | 4.66381388  | 3.49528532  | -0.83768114 |
| C | 6.09500088  | 0.58247732  | 0.12235386  |
| H | 5.02951988  | -1.10804768 | 0.92747386  |
| H | 6.87950188  | 2.40067932  | -0.69651314 |
| O | -7.25343912 | -3.29985368 | -0.30221214 |
| O | 0.06766088  | -2.98156168 | 2.51091986  |
| O | 1.13966788  | -2.51656868 | -2.18006814 |
| O | -1.51931012 | 6.20619932  | -0.05378614 |
| O | 7.34122688  | 0.02868632  | 0.18489486  |
| O | -3.71254612 | 1.96307732  | -0.15982414 |
| H | -8.11945912 | -2.93221868 | -0.09686514 |
| H | 1.70512888  | -3.27400768 | -1.99733914 |
| H | -0.62356712 | 6.55499032  | -0.00289514 |
| H | 0.66253688  | -3.73552668 | 2.44343986  |
| H | 7.27743600  | -1.03146500 | 0.56190800  |
| O | 7.27821120  | -2.14334304 | 0.37790905  |
| O | 6.84915220  | -2.63813604 | -0.77609695 |
| H | 7.63375620  | -2.67117604 | -1.35854895 |

### Cartesian coordinates 4b radical

|   |             |             |             |
|---|-------------|-------------|-------------|
| C | 1.53527338  | 2.77794243  | 0.00895209  |
| C | 0.53282698  | 1.79056700  | 0.01324689  |
| C | -0.82829522 | 2.20834292  | 0.00648401  |
| C | -1.06466705 | 3.60059609  | 0.00471391  |
| C | -0.03241687 | 4.53613542  | 0.00550821  |
| C | 1.30919033  | 4.13906728  | 0.00607601  |
| C | 2.58275434  | 0.83090618  | 0.01383375  |
| C | 1.24086297  | 0.52759924  | 0.01718397  |
| H | -2.08539917 | 3.96606706  | -0.00110281 |
| H | 2.11014931  | 4.86574353  | 0.00356295  |
| C | 3.81537537  | 0.05189588  | 0.01041580  |
| C | 5.05430843  | 0.70689190  | -0.10259001 |
| C | 3.82386920  | -1.35181027 | 0.12052224  |
| C | 6.24656541  | -0.00515895 | -0.11006516 |
| H | 5.08149438  | 1.78486194  | -0.18655826 |
| C | 5.01121859  | -2.06626941 | 0.11415200  |
| H | 2.89434131  | -1.89354119 | 0.21693780  |
| C | 6.23097426  | -1.39676811 | -0.00227017 |
| H | 7.19061551  | 0.52409821  | -0.20037402 |

|   |             |             |             |
|---|-------------|-------------|-------------|
| H | 5.01032851  | -3.14592117 | 0.20065713  |
| C | 0.63936306  | -0.83266887 | 0.01663786  |
| C | 0.29373094  | -1.44152116 | 1.22710436  |
| C | 0.40143227  | -1.48775432 | -1.19498330 |
| C | -0.28634098 | -2.70974206 | 1.21867192  |
| H | 0.46996390  | -0.94617210 | 2.17312935  |
| C | -0.17888996 | -2.75617419 | -1.18917611 |
| H | 0.66114823  | -1.02858987 | -2.13989913 |
| C | -0.52666419 | -3.37500518 | 0.01386603  |
| H | -0.97442117 | -4.36560541 | 0.01291722  |
| C | -1.90226732 | 1.24100214  | -0.00345182 |
| H | -1.58916796 | 0.20667600  | -0.01478574 |
| C | -3.24711045 | 1.50378998  | -0.00032915 |
| H | -3.57924114 | 2.53804045  | 0.01494026  |
| C | -4.29850309 | 0.54025610  | -0.01400679 |
| C | -4.07469339 | -0.87583333 | -0.03738002 |
| C | -5.65499922 | 0.99527392  | -0.00412917 |
| C | -5.11058855 | -1.75821311 | -0.04981304 |
| H | -3.05850638 | -1.25206195 | -0.04531186 |
| C | -6.70906262 | 0.13014215  | -0.01600708 |
| H | -5.83470253 | 2.06622231  | 0.01355805  |
| C | -6.50220353 | -1.31347085 | -0.03959410 |
| H | -4.94388555 | -2.82933824 | -0.06783894 |
| H | -7.73486161 | 0.48008389  | -0.00829009 |
| O | 7.36785655  | -2.15309999 | -0.00338515 |
| O | -0.38405409 | -3.35240032 | -2.40015909 |
| O | -0.59861113 | -3.25992024 | 2.42865898  |
| O | -0.26743824 | 5.88467961  | 0.00326714  |
| O | -7.44888946 | -2.11776418 | -0.05034381 |
| O | 2.76582903  | 2.20209598  | 0.00807313  |
| H | -1.21549527 | 6.05259126  | 0.00344600  |
| H | 8.14075273  | -1.58483188 | -0.08928120 |
| H | -0.81091704 | -4.20780846 | -2.28433541 |
| H | -1.01600286 | -4.11936442 | 2.30828704  |

### Cartesian coordinates 4a radical

|   |             |            |            |
|---|-------------|------------|------------|
| C | 1.68128714  | 2.73996496 | 0.06402304 |
| C | 0.66085084  | 1.76603911 | 0.10095591 |
| C | -0.69452503 | 2.19916328 | 0.15312326 |
| C | -0.90871905 | 3.58352642 | 0.17619327 |

C 0.14121095 4.51123340 0.13154076  
C 1.47498527 4.10422730 0.07378001  
C 2.70101434 0.77423130 0.00106894  
C 1.33669591 0.49851725 0.05478890  
H -1.92267610 3.95816539 0.26827011  
H 2.28409623 4.82089734 0.04845094  
C 3.88789753 -0.01934990 -0.06374205  
C 5.16611459 0.62308716 -0.08468000  
C 3.85206112 -1.44761093 -0.11352598  
C 6.32281245 -0.09767077 -0.14721923  
H 5.20256114 1.70394704 -0.04884782  
C 4.99999738 -2.18185918 -0.17801576  
H 2.89818737 -1.95478817 -0.10214920  
C 6.31426729 -1.55360990 -0.19792076  
H 7.29118564 0.38916806 -0.16160015  
H 4.97342528 -3.26473734 -0.21752413  
C 0.70097888 -0.84472511 0.05840582  
C 0.50138327 -1.51799733 1.26745201  
C 0.29000395 -1.41743725 -1.14739016  
C -0.10519991 -2.77362646 1.25990012  
H 0.81743227 -1.08733595 2.20871334  
C -0.31601724 -2.67334102 -1.13920114  
H 0.43547001 -0.90583027 -2.08971725  
C -0.51594517 -3.35968550 0.06066118  
H -0.98553389 -4.34009430 0.06096916  
C -1.80335933 1.24812011 0.19763924  
H -1.55021734 0.25086918 0.53398694  
C -3.07561416 1.51029992 -0.16409628  
H -3.30847120 2.48958898 -0.57573321  
C -4.21416758 0.59647907 -0.10084690  
C -4.16117948 -0.67309124 0.50798793  
C -5.43853239 0.98862111 -0.66497313  
C -5.26628361 -1.50642793 0.54081915  
H -3.24270399 -1.01246425 0.97165833  
C -6.55597853 0.16083284 -0.63858729  
H -5.51652465 1.96207811 -1.13796234  
C -6.47215367 -1.09372894 -0.03541625  
H -5.22068335 -2.47876995 1.01642408  
H -7.48923341 0.49109501 -1.08508324

O 7.36409463 -2.21930800 -0.25512376  
O -0.69427208 -3.18929730 -2.34477116  
O -0.27484408 -3.39079636 2.46693808  
O -0.08868005 5.85680256 0.16079527  
O -7.52736063 -1.95963913 0.03042187  
O 2.89988815 2.14740816 0.00903623  
H -1.03553108 6.02738549 0.20359089  
H -8.30107650 -1.56746217 -0.38809383  
H -1.11287087 -4.04810912 -2.22471301  
H -0.67075492 -4.26002926 2.34462934

### Cartesian coordinates 11a radical

C 1.61229301 2.75408712 -0.04122185  
C 0.60351025 1.77708410 -0.07399485  
C -0.74782006 2.19809328 -0.13254091  
C -0.97907316 3.58189920 -0.13290022  
C 0.06049078 4.51889853 -0.07624227  
C 1.39490223 4.12005023 -0.03565279  
C 2.64328005 0.79565715 0.00156478  
C 1.30296086 0.50540819 -0.04053286  
H -1.99816906 3.94268854 -0.22744091  
H 2.19989037 4.84172312 -0.01220706  
C 3.86826611 0.00316395 0.05420574  
C 5.09688021 0.59455181 -0.28301828  
C 3.87645936 -1.34655501 0.44978584  
C 6.28000941 -0.13262822 -0.24110691  
H 5.12281731 1.63368817 -0.58344385  
C 5.05387133 -2.07724296 0.49335618  
H 2.95517447 -1.83233232 0.73946594  
C 6.26360439 -1.47377504 0.14465695  
H 7.21723577 0.34566017 -0.51021630  
H 5.05357023 -3.11526699 0.80256715  
C 0.68472890 -0.84401231 -0.04605906  
C 0.05825501 -1.32048986 1.12389098  
C 0.69080703 -1.63942710 -1.17700821  
C -0.55447086 -2.59720194 1.15980995  
H 0.03548874 -0.71319917 2.02042202  
C 0.06678217 -2.95340226 -1.17901009  
H 1.15500184 -1.31054185 -2.09857833  
C -0.55728820 -3.40277746 0.04855307

H -1.01758986 -4.38510453 0.04496419  
C -1.85344331 1.24117889 -0.22694190  
H -1.60800403 0.28380993 -0.67150900  
C -3.11586444 1.45627303 0.19118909  
H -3.33728701 2.38317302 0.71561486  
C -4.25317959 0.54595428 0.05120795  
C -4.24528532 -0.57666614 -0.79415905  
C -5.42815523 0.79256729 0.78394699  
C -5.34528131 -1.41862525 -0.88732229  
H -3.37583123 -0.79054795 -1.40434223  
C -6.53462464 -0.04115094 0.70023485  
H -5.46960462 1.65641528 1.43942721  
C -6.49550256 -1.15577391 -0.13730509  
H -5.31570824 -2.27529442 -1.55463121  
H -7.43293583 0.15781812 1.27191932  
O 7.39212250 -2.24141808 0.20603410  
O 0.06455592 -3.66255110 -2.20978492  
O -1.11600783 -2.94183709 2.35357138  
O -0.18261695 5.86739033 -0.08553515  
O -7.60951275 -1.94705001 -0.19232788  
O 2.83885920 2.16558804 -0.00459802  
H -1.13171328 6.02568154 -0.11607503  
H -7.46737944 -2.66944945 -0.81310519  
H -1.52536930 -3.81178120 2.28716440  
H 8.15850663 -1.71893810 -0.05318178

### Cartesian coordinates 13a radical

C -1.49634128 2.80123522 0.04931297  
C -0.51599491 1.79360607 0.06851522  
C 0.84583321 2.17812637 0.15859230  
C 1.11069224 3.55537525 0.21040987  
C 0.09866827 4.52160739 0.16793228  
C -1.24422007 4.16037248 0.09020197  
C -2.58531027 0.88088327 -0.06222701  
C -1.25642713 0.54473030 -0.00610618  
H 2.13672724 3.88833727 0.32770889  
H -2.03045628 4.90253828 0.07385886  
C -3.82894348 0.12156313 -0.15441974  
C -5.03367528 0.69520608 0.28334584  
C -3.87587621 -1.17629594 -0.69406888

C -6.23171141 -0.00397783 0.20428994  
H -5.02884337 1.69807846 0.69038528  
C -5.06852425 -1.87937512 -0.77470279  
H -2.97451855 -1.63584510 -1.07612586  
C -6.25355955 -1.29711186 -0.32141221  
H -7.15082085 0.45825109 0.55239596  
H -5.10020239 -2.87549996 -1.19882724  
C -0.71774321 -0.83801409 0.01634681  
C 0.00061120 -1.35481388 -1.04907908  
C -0.94036226 -1.64872792 1.14632016  
C 0.51709402 -2.71358495 -1.02415483  
H 0.19698306 -0.76937080 -1.93885729  
C -0.45271325 -2.97842599 1.20433016  
H -1.49534325 -1.26686303 1.99426108  
C 0.25837979 -3.50965645 0.15846583  
H 0.64171314 -4.52444749 0.17221809  
C 1.92802503 1.19227391 0.21740083  
H 1.64706789 0.20914619 0.57444307  
C 3.20709036 1.41315091 -0.14420292  
H 3.46450810 2.38514897 -0.55841112  
C 4.32692150 0.47505194 -0.07810021  
C 4.22796852 -0.82456029 0.44764109  
C 5.58314542 0.87684406 -0.56713513  
C 5.32246318 -1.67674045 0.47691094  
H 3.28353795 -1.18318741 0.83893486  
C 6.68662445 0.03551996 -0.54176902  
H 5.69295023 1.87436592 -0.98012517  
C 6.55863023 -1.25059348 -0.01882178  
H 5.21807239 -2.67868148 0.88322699  
H 7.64778179 0.35680570 -0.92414086  
O -7.39859593 -2.03542102 -0.42446313  
O -0.74115613 -3.65581097 2.35317714  
O 1.15528389 -3.17715427 -1.99531309  
O 0.37790717 5.86193928 0.22514799  
O 7.66959130 -2.04732328 -0.01390572  
O -2.74054018 2.25335526 -0.02395215  
H 1.33060138 5.99279846 0.26989416  
H 7.44871536 -2.91420663 0.34247717  
H -8.14784053 -1.52595192 -0.09798511

### Cartesian coordinates 11b radical

C -1.64816646 2.80943324 0.08379786  
C -0.62320411 1.82514503 0.12098897  
C 0.75224292 2.25431625 0.18973809  
C 0.97668499 3.61233218 0.21316688  
C -0.07569933 4.62324012 0.14801670  
C -1.45128342 4.15661638 0.08893670  
C -2.65324022 0.83825380 0.00967019  
C -1.28719297 0.56758229 0.06646202  
H 1.98190109 4.00151241 0.31875097  
H -2.25816442 4.87640063 0.05322676  
C -3.85061646 0.02285622 -0.06516130  
C -5.11569564 0.63994781 -0.00397095  
C -3.80956448 -1.37961430 -0.20799788  
C -6.28228435 -0.10629001 -0.07452086  
H -5.17833753 1.71447608 0.10148297  
C -4.97250133 -2.12697398 -0.28096031  
H -2.85984425 -1.89038042 -0.26834790  
C -6.21716168 -1.49525699 -0.21278799  
H -7.24598544 0.39153084 -0.02254930  
H -4.93557164 -3.20352635 -0.39328083  
C -0.65550033 -0.77866527 0.05791369  
C -0.18646830 -1.31143087 -1.14481306  
C -0.52458187 -1.49763829 1.24984311  
C 0.41141785 -2.57101719 -1.15137010  
H -0.27297026 -0.76184484 -2.07290212  
C 0.07385198 -2.75664728 1.22772509  
H -0.88228188 -1.09660025 2.18937826  
C 0.54205319 -3.30287038 0.03095581  
H 1.00416516 -4.28683314 0.01980075  
C 1.85003806 1.28250022 0.25916191  
H 1.61548712 0.32950386 0.71881585  
C 3.09122224 1.49626296 -0.21548733  
H 3.28357023 2.42089119 -0.75467820  
C 4.23800702 0.59200699 -0.11843199  
C 4.27135947 -0.52777599 0.72941104  
C 5.38129341 0.84578611 -0.89711895  
C 5.38222317 -1.35924204 0.78322784

H 3.42595648 -0.74649923 1.37096331  
C 6.49749756 0.02193016 -0.85383807  
H 5.39016718 1.70909699 -1.55426396  
C 6.50063929 -1.08891501 -0.01098307  
H 5.38840766 -2.21332935 1.45486384  
H 7.37160048 0.22739593 -1.45967141  
O -7.32678181 -2.28313842 -0.28787031  
O 0.17734688 -3.41981908 2.41896128  
O 0.84902680 -3.04635542 -2.35385819  
O 0.19820969 5.84021761 0.15713918  
O 7.62337878 -1.87072095 0.00496686  
O -2.87070614 2.19356405 0.02426278  
H -8.12142188 -1.74131912 -0.23207703  
H 0.58664325 -4.28098732 2.28507732  
H 1.29432098 -3.89201029 -2.23713016  
H 7.51633151 -2.58269719 0.64428124

### Cartesian coordinates RAF 11b

C 1.67078509 2.44923234 -0.29838612  
C 0.64261327 1.46074405 -0.28527416  
C -0.73525686 1.89093023 -0.40693625  
C -0.96397785 3.22964125 -0.50387305  
C 0.09012524 4.29541957 -0.44655998  
C 1.48899312 3.78580019 -0.39349303  
C 2.66839110 0.47493499 -0.10668425  
C 1.29680706 0.21250912 -0.15719210  
H -1.97631933 3.59556732 -0.63996421  
H 2.30019592 4.50022440 -0.43427090  
C 3.85740739 -0.34043190 0.02577622  
C 5.12882664 0.25617788 -0.09481586  
C 3.80639735 -1.72651010 0.28640184  
C 6.28926473 -0.49362606 0.03045521  
H 5.20045343 1.31729098 -0.29152586  
C 4.96338943 -2.47622038 0.41335411  
H 2.85270618 -2.22119028 0.39873823  
C 6.21328069 -1.86517835 0.28388084  
H 7.25713256 -0.01106880 -0.06972810  
H 4.91710653 -3.53900515 0.61714027  
C 0.65331588 -1.12617915 -0.08779580  
C 0.12604579 -1.57586286 1.12464612

C 0.56634719 -1.92020590 -1.23523729  
 C -0.48683778 -2.82647221 1.18570524  
 H 0.17765592 -0.96703226 2.01762214  
 C -0.04846523 -3.16871707 -1.15889130  
 H 0.96944796 -1.58391217 -2.18175811  
 C -0.57540723 -3.63191227 0.04831812  
 H -1.05060417 -4.60829721 0.10180418  
 C -1.83668533 0.91677895 -0.45086378  
 H -1.62691735 -0.02031723 -0.95507709  
 C -3.04539126 1.11639095 0.10276199  
 H -3.19649835 2.02004101 0.68899619  
 C -4.19918816 0.21497720 0.04273583  
 C -4.29781251 -0.85401800 -0.86289230  
 C -5.27762547 0.41700808 0.92173310  
 C -5.40753160 -1.68953701 -0.87577829  
 H -3.50537329 -1.02937305 -1.58091439  
 C -6.39199867 -0.41116120 0.92018791  
 H -5.23537860 1.24086032 1.62654799  
 C -6.45932959 -1.47271087 0.01871224  
 H -5.46480763 -2.50414929 -1.59261397  
 H -7.21561067 -0.24645107 1.60426327  
 O 7.31846685 -2.65561146 0.41708481  
 O -0.10972014 -3.90732839 -2.30886701  
 O -0.98170582 -3.22013405 2.39628127  
 O -0.00695921 5.21545825 -1.51015386  
 O -7.57841935 -2.26118444 0.04733914  
 O 2.89236007 1.83151209 -0.19901615  
 H 8.11573640 -2.12630192 0.30773721  
 H -1.43601295 -4.06476709 2.31188809  
 H -0.89328506 5.60037861 -1.49477703  
 H -0.53480928 -4.75365056 -2.13583822  
 H -7.51920759 -2.93487100 -0.63796710  
 O -0.18356312 5.19446738 0.70727185  
 O -0.25014103 4.42034245 1.92743923  
 H 0.64295089 4.54503936 2.28067510

**Cartesian coordinates RAF 2b**

C 1.73943790 2.78984521 0.02990486  
 C 0.84407317 1.70622197 0.02199896  
 C -0.55290820 1.98009131 0.01687176

C -0.92963213 3.33996306 0.03306511  
 C 0.00222889 4.37769552 0.04924206  
 C 1.37617095 4.12262045 0.04639509  
 C 2.98132429 0.96056730 0.02296682  
 C 1.67885134 0.52177088 0.02126287  
 H -1.98238635 3.59723952 -0.00627287  
 H 2.09892123 4.92700850 0.04886899  
 C 4.28729935 0.31023122 0.02385002  
 C 5.44410569 1.06747698 -0.22828019  
 C 4.44705849 -1.06375634 0.28360990  
 C 6.70291570 0.47977485 -0.23005610  
 H 5.35368729 2.12721528 -0.42592418  
 C 5.70130435 -1.65438906 0.28397292  
 H 3.58431754 -1.67806604 0.49827806  
 C 6.83735371 -0.88564110 0.02495600  
 H 7.58145260 1.08610984 -0.43063810  
 H 5.81766355 -2.71146824 0.48974508  
 C 1.22745785 -0.89451487 0.01210916  
 C 0.83873324 -1.50808637 1.20731207  
 C 1.18843526 -1.60746003 -1.18955923  
 C 0.41820190 -2.83649113 1.19418901  
 H 0.86313413 -0.96951305 2.14572326  
 C 0.76770919 -2.93674746 -1.18813416  
 H 1.48751090 -1.14680595 -2.12197696  
 C 0.37941585 -3.56025003 -0.00032809  
 H 0.05490902 -4.59793433 -0.00378520  
 C -1.53067006 0.91533694 -0.03117224  
 H -1.14096595 -0.06719916 -0.26131725  
 C -2.87918726 1.04889016 0.19559291  
 H -3.25738919 2.02329704 0.48854279  
 C -3.86659338 0.03572793 0.10093897  
 C -3.61890721 -1.28758985 -0.31391112  
 C -5.29034953 0.44380614 0.41315620  
 C -4.61208612 -2.23763711 -0.35535099  
 H -2.61561413 -1.57278516 -0.60758227  
 C -6.28072328 -0.67145925 0.46323594  
 H -5.32465133 1.03075314 1.33870625  
 C -5.95197244 -1.91857022 0.06340178  
 H -4.38898922 -3.24376234 -0.69784826

H -7.28450954 -0.45612115 0.80661694  
 O 8.04729844 -1.52185291 0.03834418  
 O 0.75402307 -3.58912352 -2.38976816  
 O 0.05655317 -3.38947130 2.39074238  
 O -0.37642812 5.69399959 0.05269600  
 O -6.90993566 -2.90206413 0.06791514  
 O 3.02369128 2.34328629 0.02486498  
 H 8.75072688 -0.89058203 -0.14652124  
 H -0.21931804 -4.30326039 2.26522630  
 H -1.33733886 5.75591438 0.04295014  
 H 0.46907700 -4.50088322 -2.26963540  
 H -6.50759955 -3.74920917 -0.14688479  
 O -5.60992867 1.40855236 -0.65788427  
 O -6.81541349 2.12591139 -0.26907023  
 H -7.45578464 1.76158926 -0.89644901

**Cartesian coordinates RAF 2b**

C -2.28605524 2.73720107 -0.07376995  
 C -1.20501333 1.84008529 -0.01775178  
 C 0.11799912 2.37035900 0.00032015  
 C 0.23185584 3.77873726 -0.03285291  
 C -0.87634927 4.62209656 -0.08413389  
 C -2.17856294 4.11369534 -0.10733196  
 C -3.16701206 0.70929013 -0.03601792  
 C -1.80527390 0.52184709 0.00841498  
 H 1.21717911 4.23114729 -0.03550091  
 H -3.03841617 4.76795157 -0.15145582  
 C -4.33118719 -0.16978705 -0.04105886  
 C -5.61543052 0.37557720 -0.21379078  
 C -4.23017731 -1.56385424 0.12786616  
 C -6.74573037 -0.43169804 -0.22336519  
 H -5.72745947 1.44364792 -0.34237821  
 C -5.35550448 -2.37319645 0.11950886  
 H -3.26356204 -2.02381193 0.27302900  
 C -6.62124672 -1.81174203 -0.05754485  
 H -7.72629052 0.01483284 -0.36056391  
 H -5.26957827 -3.44478514 0.25205083  
 C -1.09753796 -0.78451215 0.06952119  
 C -0.80316618 -1.47457304 -1.11007417  
 C -0.72208617 -1.31426832 1.30784622

C -0.14150305 -2.70008405 -1.04306921  
H -1.08698034 -1.07716410 -2.07581418  
C -0.05932712 -2.53962322 1.36046391  
H -0.94155608 -0.79081889 2.22929728  
C 0.23462185 -3.24109635 0.18848976  
H 0.74616691 -4.19933739 0.23533412  
C 1.27059903 1.50356613 0.03825105  
H 1.06017011 0.44586623 -0.03281111  
C 2.58751429 1.89507792 0.16108526  
H 2.80382396 2.95488448 0.26408802  
C 3.72317523 1.05589912 0.17841423  
C 3.66338720 -0.38137328 0.05556414  
C 5.02870948 1.64001608 0.34200726  
C 4.77362541 -1.14611114 0.04808422  
H 2.69588132 -0.86316006 -0.02272975  
C 6.16487473 0.91107018 0.35128691  
H 5.08924630 2.71528520 0.48085913  
C 6.15775254 -0.57188979 0.15541724  
H 4.70224734 -2.22602114 -0.02329809  
H 7.13896040 1.36010407 0.49828811  
O -7.69396150 -2.65848543 -0.05761311  
O 0.27684490 -3.01448836 2.59632721  
O 0.11552627 -3.33703248 -2.22508397  
O -0.75332932 5.98603240 -0.12179120  
O 6.89982256 -1.17325422 1.19323596  
O -3.46380853 2.05935941 -0.08777516  
H -8.50644384 -2.15727519 -0.18480192  
H 0.55552922 -4.17746332 -2.06051990  
H 0.17774376 6.23021225 -0.10171475  
H 0.75089193 -3.84870243 2.51633201  
H 7.05367978 -2.09446926 0.94371989  
O 6.88303864 -0.73789322 -1.10261700  
O 7.08009843 -2.17161008 -1.32225202  
H 6.53721231 -2.30620419 -2.11152729

**Cartesian coordinates RAF 7a**

C -1.58315016 2.63559110 0.36408294  
C -0.53207979 1.67708335 0.26944277  
C 0.78540487 2.14965504 -0.03031709  
C 0.96146532 3.54134940 -0.12506787

C -0.09526990 4.43612727 0.03661483  
C -1.40857935 3.99092940 0.27216115  
C -2.60739813 0.62696497 0.68434789  
C -1.11175695 0.40603029 0.47097781  
H 1.93612408 3.93274054 -0.39649399  
H -2.22848234 4.68960847 0.36521803  
C -3.59022527 -0.07924112 -0.22763618  
C -4.83893858 -0.49685193 0.23286127  
C -3.29214343 -0.22593699 -1.58690520  
C -5.76225657 -1.06523909 -0.63992823  
H -5.09000938 -0.38304707 1.27849435  
C -4.20714328 -0.78776606 -2.46751594  
H -2.33124592 0.10533114 -1.96547596  
C -5.44816448 -1.21327114 -1.99121197  
H -6.72810348 -1.39348615 -0.26677677  
H -3.97706654 -0.90301399 -3.51961715  
C -0.44877088 -0.87085694 0.76322811  
C -0.86503282 -2.07503417 0.17185719  
C 0.60274506 -0.89260295 1.70027190  
C -0.22622909 -3.26598832 0.50253000  
H -1.67846292 -2.10206031 -0.53832514  
C 1.22339906 -2.09435337 2.02499305  
H 0.93532026 0.01559274 2.18448443  
C 0.81976594 -3.29148302 1.42841185  
H 1.30858813 -4.22810135 1.68413517  
C 1.87685517 1.22595287 -0.31261993  
H 1.57437111 0.22630900 -0.60125119  
C 3.19512513 1.50687931 -0.23978926  
H 3.50034504 2.47934623 0.13934877  
C 4.30067642 0.61528815 -0.58385396  
C 4.13209219 -0.59973616 -1.27091812  
C 5.61311855 0.97480799 -0.22558614  
C 5.21405964 -1.41623919 -1.57068010  
H 3.14432306 -0.90934295 -1.59074914  
C 6.70298873 0.16710200 -0.51858312  
H 5.77810226 1.90927892 0.30089018  
C 6.50597763 -1.03715883 -1.19383022  
H 5.05727818 -2.34649099 -2.10952118  
H 7.70807360 0.45475429 -0.23493988

O -6.31382225 -1.76658734 -2.89443339  
O 2.22665615 -2.04760691 2.95378909  
O -0.66774919 -4.40230121 -0.11941308  
O 0.07547920 5.78667228 -0.06431885  
O 7.60856658 -1.79987629 -1.46657717  
O -2.79211432 2.04572410 0.54605324  
H -7.12965958 -2.01969916 -2.44980226  
H -0.17190005 -5.16518324 0.19488698  
H 1.00502190 5.98677325 -0.21858090  
H 2.59449202 -2.92696245 3.08867848  
H 7.34747635 -2.58933096 -1.95219837  
O -2.95669744 0.47397295 2.09530219  
O -2.93160809 -0.92429908 2.46672800  
H -2.04350103 -1.01061318 2.84651004

**Cartesian coordinates RAF 7a**

C -1.67303039 2.73267343 -0.15142513  
C -0.72385098 1.70811695 -0.02957095  
C 0.67115921 2.06132319 -0.00960880  
C 0.96484623 3.45584335 -0.10253127  
C -0.02443000 4.42206651 -0.21117876  
C -1.38636131 4.08297449 -0.24492228  
C -2.81153301 0.83989531 -0.06193226  
C -1.48215086 0.48359127 0.02296206  
H 1.99867813 3.77362223 -0.03773193  
H -2.15289837 4.84059861 -0.33198781  
C -4.07462407 0.11287986 -0.06632178  
C -5.27529920 0.80084891 -0.31619822  
C -4.15257717 -1.27155102 0.17909898  
C -6.49611059 0.13846081 -0.32617798  
H -5.24880436 1.86551438 -0.50541878  
C -5.36895564 -1.93626432 0.17031676  
H -3.25471843 -1.83613922 0.38501085  
C -6.54890237 -1.23485734 -0.08358408  
H -7.40921651 0.69254697 -0.52360925  
H -5.42128068 -3.00096524 0.36267322  
C -0.93923194 -0.89674324 0.12109375  
C -0.72636615 -1.63928422 -1.04321791  
C -0.63027497 -1.44202705 1.37130992  
C -0.20902978 -2.93027245 -0.95137814



|   |             |             |             |   |             |             |             |                                      |             |             |             |
|---|-------------|-------------|-------------|---|-------------|-------------|-------------|--------------------------------------|-------------|-------------|-------------|
| H | -0.95682602 | -1.22868819 | -2.01752319 | C | 0.70170226  | 4.11326354  | -0.49492202 | O                                    | 0.00421596  | -4.03329744 | -0.71438505 |
| C | -0.11432187 | -2.73425726 | 1.44787235  | C | 2.37736848  | 0.99209621  | -0.30732286 | O                                    | 0.44963238  | -2.51812910 | 3.85361213  |
| H | -0.78814707 | -0.87787383 | 2.28138631  | C | 1.16973943  | 0.59430309  | 0.20592615  | O                                    | -1.02469089 | 5.69736727  | -0.24344482 |
| C | 0.09748503  | -3.48782947 | 0.29147083  | H | -2.46006089 | 3.66236801  | 0.66830694  | O                                    | -5.68511047 | -2.71016011 | -3.01855721 |
| H | 0.49847015  | -4.49625239 | 0.35748728  | H | 1.35203835  | 4.87864434  | -0.89642732 | O                                    | 2.34527547  | 2.33524809  | -0.64379387 |
| C | 1.68842891  | 1.09967107  | 0.08835514  | C | 3.65312222  | 0.32955783  | -0.56428710 | H                                    | 7.86158368  | -1.02831416 | -1.91375841 |
| H | 1.42200510  | 0.06043575  | 0.21146981  | C | 4.58656972  | 0.92333916  | -1.42964801 | H                                    | 0.16553405  | -3.41673504 | 4.04991308  |
| C | 3.15044405  | 1.41844586  | -0.00112503 | C | 4.00148331  | -0.89222512 | 0.03957611  | H                                    | -1.93012586 | 5.77937070  | 0.07289999  |
| H | 3.34277405  | 2.12248338  | -0.81950400 | C | 5.80970261  | 0.31834986  | -1.69259724 | H                                    | -0.13759878 | -4.88225915 | -0.28286694 |
| C | 4.02240751  | 0.19460017  | -0.18761186 | H | 4.34915752  | 1.86767607  | -1.90157410 | H                                    | -5.10378809 | -3.45808548 | -3.19289306 |
| C | 4.17991553  | -0.73209397 | 0.84714292  | C | 5.22088867  | -1.49971214 | -0.21922120 | O                                    | -2.09487726 | 1.32406233  | 2.49251639  |
| C | 4.68854641  | -0.03809177 | -1.39380525 | H | 3.31872136  | -1.36835235 | 0.72929409  | O                                    | -2.73770696 | 0.19372491  | 3.14120409  |
| C | 4.97917056  | -1.86015593 | 0.68232009  | C | 6.13119683  | -0.89842390 | -1.08991622 | H                                    | -3.66521339 | 0.47264313  | 3.15117326  |
| H | 3.67798614  | -0.56647684 | 1.79426701  | H | 6.51392957  | 0.79527932  | -2.36817032 | <b>Cartesian coordinates RAF 10b</b> |             |             |             |
| C | 5.48210061  | -1.16566688 | -1.57654391 | H | 5.48620650  | -2.43751794 | 0.25348596  | C                                    | 1.44977791  | 2.57591525  | -0.26972588 |
| H | 4.58786515  | 0.67454012  | -2.20593516 | C | 0.82913238  | -0.77025294 | 0.68451300  | C                                    | 0.55990181  | 1.51687918  | -0.09591391 |
| C | 5.63008821  | -2.07967294 | -0.53375781 | C | 0.77545105  | -1.02985407 | 2.05707707  | C                                    | -0.84000221 | 1.76536123  | -0.09252876 |
| H | 5.09677649  | -2.56779397 | 1.49831299  | C | 0.56977732  | -1.79214236 | -0.23599030 | C                                    | -1.28130693 | 3.21365745  | -0.09646319 |
| H | 5.99816855  | -1.34480132 | -2.51195836 | C | 0.47104237  | -2.31454403 | 2.50410802  | C                                    | -0.21121687 | 4.25029822  | -0.34272905 |
| O | -7.71865079 | -1.94271393 | -0.07930727 | H | 0.95907026  | -0.24776925 | 2.78202503  | C                                    | 1.10496126  | 3.94056548  | -0.41817915 |
| O | 0.16941292  | -3.22290747 | 2.69433242  | C | 0.26214806  | -3.07019009 | 0.22626190  | C                                    | 2.69572733  | 0.75643824  | -0.14138081 |
| O | -0.02241119 | -3.61332439 | -2.12055717 | H | 0.61287404  | -1.60721608 | -1.30154319 | C                                    | 1.39564520  | 0.33054422  | -0.02141104 |
| O | 0.26660796  | 5.75871320  | -0.28479896 | C | 0.21282133  | -3.34257244 | 1.59402634  | H                                    | -2.09360829 | 3.35893936  | -0.82154609 |
| O | 6.42713074  | -3.17100523 | -0.75768181 | H | -0.02765692 | -4.34206761 | 1.94786600  | H                                    | 1.85621726  | 4.70202932  | -0.58206322 |
| O | -2.92993801 | 2.21175823  | -0.16998179 | C | -1.98736326 | 1.02578099  | 1.06866710  | C                                    | 4.00357250  | 0.11132778  | -0.12483820 |
| H | -8.45804265 | -1.35306019 | -0.26118019 | H | -1.53228723 | 0.04196587  | 0.98526295  | C                                    | 5.13888525  | 0.81745926  | -0.55756020 |
| H | 0.36793588  | -4.47518955 | -1.94261127 | C | -3.33135123 | 1.05440895  | 0.41421296  | C                                    | 4.18642758  | -1.20877895 | 0.32733793  |
| H | 1.21870103  | 5.88503840  | -0.21203127 | H | -3.93327818 | 1.93916685  | 0.60203808  | C                                    | 6.39823237  | 0.23019210  | -0.55032899 |
| H | 0.49111300  | -4.12789529 | 2.62837418  | C | -3.88004507 | 0.06997681  | -0.43467201 | H                                    | 5.03178824  | 1.83659696  | -0.90469783 |
| H | 6.48227842  | -3.70355652 | 0.04257019  | C | -3.20767510 | -1.13182018 | -0.79806015 | C                                    | 5.44101635  | -1.79936828 | 0.33509091  |
| O | 3.47566422  | 2.11910035  | 1.23556326  | C | -5.18041719 | 0.26233803  | -0.99286617 | H                                    | 3.34112725  | -1.77819325 | 0.68708797  |
| O | 4.78607113  | 2.73511029  | 1.08032382  | C | -3.78984098 | -2.05642142 | -1.64722029 | C                                    | 6.55473231  | -1.08327504 | -0.10630324 |
| H | 5.37084533  | 2.05033429  | 1.43847998  | H | -2.21689283 | -1.33836494 | -0.41548299 | H                                    | 7.25979644  | 0.79644086  | -0.89229286 |

**Cartesian coordinates RAF 8b**

|   |             |            |             |   |             |             |             |   |            |             |             |
|---|-------------|------------|-------------|---|-------------|-------------|-------------|---|------------|-------------|-------------|
| C | 1.10807599  | 2.80214911 | -0.32932023 | C | -5.76099713 | -0.66091593 | -1.83672713 | H | 5.57496857 | -2.81465198 | 0.68816697  |
| C | 0.31199814  | 1.76847914 | 0.19848222  | H | -5.72419338 | 1.16745180  | -0.74339402 | C | 0.94373629 | -1.07218984 | 0.16263786  |
| C | -1.02055008 | 2.07484208 | 0.54376719  | C | -5.06698540 | -1.83103795 | -2.17399508 | C | 0.52189418 | -1.50570401 | 1.42382706  |
| C | -1.44509681 | 3.39666546 | 0.39302523  | H | -3.24636431 | -2.95997252 | -1.90940434 | C | 0.93712211 | -1.95427539 | -0.92216703 |
| C | -0.60323296 | 4.40021149 | -0.10551212 | H | -6.74845722 | -0.49886016 | -2.25221224 | C | 0.10427491 | -2.82381310 | 1.59498891  |
|   |             |            |             | O | 7.31761487  | -1.54293428 | -1.30824205 | H | 0.51731680 | -0.83355418 | 2.27201141  |

C 0.51822698 -3.27056200 -0.73641206  
H 1.25794587 -1.63329817 -1.90454808  
C 0.10001397 -3.71576411 0.51947425  
H -0.22247617 -4.74468047 0.65929823  
C -1.82011097 0.74714483 -0.13640708  
H -1.43761213 -0.26461826 -0.18789020  
C -3.18292707 0.92239828 -0.14040713  
H -3.57955812 1.92694392 -0.03795894  
C -4.18577034 -0.11849602 -0.24914882  
C -3.88742021 -1.49090134 -0.37897505  
C -5.55177050 0.23869228 -0.22792775  
C -4.89188436 -2.44218793 -0.48102318  
H -2.85678825 -1.82358925 -0.40134178  
C -6.56227732 -0.70420897 -0.33037224  
H -5.81684438 1.28604095 -0.12789420  
C -6.23557228 -2.05509636 -0.45811509  
H -4.63381837 -3.49286618 -0.58210291  
H -7.60573178 -0.41348481 -0.31359890  
O 7.76730864 -1.71658220 -0.07594117  
O 0.53607296 -4.09305320 -1.82952503  
O -0.28915197 -3.19797528 2.84991000  
O -0.63071525 5.53191524 -0.49868500  
O -7.26513742 -2.95131518 -0.55807985  
O 2.72776319 2.13343206 -0.30032396  
H 8.45390660 -1.12100432 -0.39401321  
H -0.55631505 -4.12286757 2.85201719  
H -1.52327587 5.60709440 -0.12474084  
H 0.24474977 -4.97706655 -1.58364018  
H -6.91327636 -3.84262112 -0.65207390  
O -1.88846426 3.42917547 1.22275823  
O -2.71479306 4.65903261 1.11576123  
H -2.66490805 4.95785212 2.03460820

**Cartesian coordinates RAF 11a**

C 1.57483308 3.04219026 -0.24209012  
C 0.57828701 2.05134238 -0.20637278  
C -0.77986121 2.45502418 -0.26369008  
C -1.02388230 3.83250114 -0.38170984  
C 0.00460384 4.78108628 -0.41620214  
C 1.34321590 4.40173710 -0.34420281

C 2.63278329 1.10824533 -0.04327823  
C 1.29677425 0.79675308 -0.07048906  
H -2.04778207 4.17691932 -0.48400403  
H 2.14083525 5.13126033 -0.37490197  
C 3.86852541 0.34213108 0.09115025  
C 5.07117913 1.00692112 0.38510292  
C 3.91397644 -1.05552499 -0.06737908  
C 6.26373827 0.30812986 0.52555080  
H 5.06905925 2.08191136 0.50647025  
C 5.10171531 -1.75734526 0.07298307  
H 3.01775497 -1.60478187 -0.31766087  
C 6.28393538 -1.07891303 0.37285088  
H 7.17982453 0.84453302 0.75547408  
H 5.12833663 -2.83254029 -0.05507624  
C 0.70871121 -0.56159888 0.07379483  
C 0.50787310 -1.08893089 1.37342399  
C 0.34415677 -1.28907102 -1.02669118  
C -0.06450724 -2.37770609 1.55122013  
H 0.78992881 -0.51853391 2.24861119  
C -0.26286721 -2.65353233 -0.91719223  
H 0.47109211 -0.90635998 -2.03137705  
C -0.43754809 -3.14107814 0.48939900  
H -0.84593905 -4.13789621 0.61802981  
C -1.87793840 1.48707591 -0.21598105  
H -1.62739837 0.47762586 -0.51732103  
C -3.13785810 1.75256996 0.18104900  
H -3.36586417 2.74954942 0.55116298  
C -4.27132931 0.82773323 0.20395497  
C -4.22701124 -0.47178427 -0.33168883  
C -5.48335635 1.24698290 0.78172392  
C -5.33600959 -1.30566813 -0.28188690  
H -3.32348025 -0.84441607 -0.79982125  
C -6.59839155 0.42158228 0.83604502  
H -5.54964162 2.24634208 1.19977712  
C -6.52712831 -0.86393795 0.30195224  
H -5.27997131 -2.30439441 -0.70635796  
H -7.52565985 0.75734313 1.28420894  
O 7.42515374 -1.82153234 0.49937504  
O -1.48739924 -2.64582433 -1.63329500

O -0.19732808 -2.77253635 2.85528115  
O -0.25416595 6.12201032 -0.53840398  
O -7.64931481 -1.64490091 0.37172691  
O 2.80866223 2.47710516 -0.14777804  
H 8.16996861 -1.24412429 0.69748101  
H -0.58436514 -3.65383238 2.89300302  
H -1.20537423 6.26500036 -0.57641902  
H -1.86972927 -3.52985303 -1.55749935  
H -7.47730152 -2.49835798 -0.03941894  
O 0.69580405 -3.49269843 -1.62255799  
O 0.13338495 -4.84460343 -1.68870991  
H 0.13760090 -4.97303951 -2.64754945

**Cartesian coordinates RAF 12b**

C 1.57938824 2.35668823 -0.27390902  
C 0.54045507 1.46585220 -0.17997477  
C -0.82667488 1.94797607 -0.23661526  
C -0.96767627 3.37075324 -0.40998325  
C 0.07438486 4.23699629 -0.48240486  
C 1.51429309 3.83019128 -0.34603906  
C 2.52332033 0.37243495 -0.13668013  
C 1.16653791 0.15659995 -0.08891712  
H -1.96773925 3.77931829 -0.51330405  
H 2.10517240 4.23761013 -1.17827135  
C 3.70853449 -0.48262500 -0.10291386  
C 4.94249540 0.01373215 -0.55332890  
C 3.66889012 -1.80181202 0.38161617  
C 6.08632472 -0.77528118 -0.53167708  
H 5.00523518 1.02801200 -0.92557281  
C 4.80724828 -2.59439730 0.40351988  
H 2.74158530 -2.21216622 0.75661922  
C 6.02276736 -2.08537641 -0.05537893  
H 7.02873278 -0.36961285 -0.88817109  
H 4.77120548 -3.60877240 0.78182023  
C 0.50311897 -1.17019293 0.00632896  
C 0.02097606 -1.62583518 1.23849014  
C 0.37600584 -1.96616336 -1.13492803  
C -0.57791289 -2.88108913 1.32230335  
H 0.11197020 -1.02160631 2.13190908  
C -0.22636615 -3.21966044 -1.03737897

|   |             |             |             |   |             |             |             |   |             |             |             |
|---|-------------|-------------|-------------|---|-------------|-------------|-------------|---|-------------|-------------|-------------|
| H | 0.74362527  | -1.62835618 | -2.09491801 | C | -1.28841600 | 0.52608000  | 0.03167800  | O | 0.22471100  | 5.88216900  | 0.14633300  |
| C | -0.70681094 | -3.68655141 | 0.18788279  | H | 2.02909800  | 3.94798700  | 0.25548200  | O | 7.63046400  | -1.94998600 | 0.08369500  |
| H | -1.17047710 | -4.66748833 | 0.25933178  | H | -2.16339400 | 4.86820500  | 0.05085100  | O | -2.81550400 | 2.19815400  | 0.00924900  |
| C | -1.93874192 | 1.07605706  | -0.16489904 | C | -3.85664500 | 0.04190700  | -0.07255300 | H | -8.16769100 | -1.63244800 | -0.06555400 |
| H | -1.70088310 | 0.02370079  | -0.08211402 | C | -5.09353400 | 0.66188800  | 0.17167800  | H | 1.31851400  | -3.94388900 | -2.22959700 |
| C | -3.26972007 | 1.42715029  | -0.18704087 | C | -3.86171100 | -1.32995900 | -0.38569100 | H | 1.17496200  | 6.03310100  | 0.17543600  |
| H | -3.53510617 | 2.47839000  | -0.24557105 | C | -6.28181800 | -0.05668200 | 0.11810100  | H | 0.31146900  | -4.43405200 | 2.21929000  |
| C | -4.40339131 | 0.52796914  | -0.13219694 | H | -5.12219100 | 1.71723100  | 0.40798500  | H | 7.46591300  | -2.72125800 | 0.63601700  |
| C | -4.29333514 | -0.87753410 | -0.07375620 | C | -5.04481600 | -2.05114200 | -0.44032500 |   |             |             |             |
| C | -5.70972621 | 1.06587093  | -0.13849098 | H | -2.93257400 | -1.83903800 | -0.59930000 |   |             |             |             |
| C | -5.41779235 | -1.68817121 | -0.02301974 | C | -6.26253900 | -1.41825300 | -0.18587800 | C | 1.58547600  | 2.78824700  | 0.00006300  |
| H | -3.31718251 | -1.34671324 | -0.06915976 | H | -7.22518400 | 0.44489900  | 0.31394600  | C | 0.57507100  | 1.79122800  | 0.00004200  |
| C | -6.83848033 | 0.26402399  | -0.08795296 | H | -5.04171000 | -3.10602300 | -0.68650700 | C | -0.80449600 | 2.21345300  | -0.00000800 |
| H | -5.83230535 | 2.14316839  | -0.18274713 | C | -0.68342500 | -0.83101300 | 0.02613200  | C | -1.03212600 | 3.60462600  | -0.00009500 |
| C | -6.69730748 | -1.12345124 | -0.02947888 | C | -0.14408000 | -1.34381800 | -1.15768200 | C | 0.00457800  | 4.53271400  | -0.00008200 |
| H | -5.30430658 | -2.76799231 | 0.02021087  | C | -0.64700900 | -1.58829500 | 1.20091000  | C | 1.36402400  | 4.13377200  | -0.00000400 |
| H | -7.83321978 | 0.69295390  | -0.09274784 | C | 0.42265800  | -2.61651900 | -1.16233300 | C | 2.63345600  | 0.84828200  | 0.00011000  |
| O | 7.11204168  | -2.91161630 | -0.01039992 | H | -0.16017500 | -0.76785000 | -2.07371400 | C | 1.25676700  | 0.54737600  | 0.00002700  |
| O | -0.32053113 | -3.95837653 | -2.18386635 | C | -0.07820800 | -2.86072400 | 1.18157600  | H | -2.04835200 | 3.97948400  | -0.00019000 |
| O | -1.02195716 | -3.28207848 | 2.55215625  | H | -1.06093400 | -1.20545000 | 2.12462900  | H | 2.15789600  | 4.86808600  | -0.00000900 |
| O | -0.05453701 | 5.57645768  | -0.68567983 | C | 0.45865400  | -3.38471500 | 0.00399000  | C | 3.83290100  | 0.05996400  | 0.00011500  |
| O | -7.83893754 | -1.87651597 | 0.01810580  | H | 0.89804100  | -4.37919100 | -0.00569200 | C | 5.09129100  | 0.71058300  | 0.00006100  |
| O | 2.77722539  | 1.72078122  | -0.25188202 | C | 1.87106000  | 1.24352800  | 0.20238300  | C | 3.81631300  | -1.35694300 | 0.00017600  |
| H | 7.88757581  | -2.44745430 | -0.34272588 | H | 1.60821900  | 0.26043100  | 0.57434100  | C | 6.26654200  | -0.01142600 | 0.00007400  |
| H | -1.40005589 | -4.16571823 | 2.49689322  | C | 3.14314300  | 1.47780700  | -0.17373300 | H | 5.13302600  | 1.79106600  | -0.00000100 |
| H | -0.98714999 | 5.82042744  | -0.68876017 | H | 3.38275900  | 2.43603100  | -0.62890500 | C | 4.98874900  | -2.08028500 | 0.00019000  |
| H | -0.73819380 | -4.80593856 | -1.99939093 | C | 4.27420400  | 0.55446600  | -0.07320500 | H | 2.87685900  | -1.88827200 | 0.00023200  |
| H | -7.61178080 | -2.81142347 | 0.05533395  | C | 4.23462000  | -0.64309800 | 0.66120500  | C | 6.22515600  | -1.41530500 | 0.00015000  |
| O | 2.18349434  | 4.50124359  | 0.76120507  | C | 5.47802200  | 0.86638100  | -0.73032400 | H | 7.22120600  | 0.50428400  | 0.00000600  |
| O | 1.52353623  | 4.14632124  | 2.00357196  | C | 5.33441700  | -1.48862700 | 0.72309500  | H | 4.97940000  | -3.16282500 | 0.00025000  |
| H | 2.15581731  | 3.51498420  | 2.37660011  | H | 3.33780400  | -0.91607300 | 1.20446300  | C | 0.66490100  | -0.81655600 | -0.00008500 |

### Cartesian coordinates Vam3 radical cation

### Cartesian coordinates Vam3

|   |             |            |             |   |             |             |             |   |             |             |             |
|---|-------------|------------|-------------|---|-------------|-------------|-------------|---|-------------|-------------|-------------|
| C | -1.58624300 | 2.77765700 | 0.05608100  | C | 6.58436700  | 0.02950100  | -0.67692700 | C | 0.39245500  | -1.45002400 | 1.21491000  |
| C | -0.58276300 | 1.79388800 | 0.07957000  | H | 5.54313100  | 1.78684800  | -1.30141500 | C | 0.39252200  | -1.44985600 | -1.21517400 |
| C | 0.77106700  | 2.20823400 | 0.13819700  | C | 6.51507900  | -1.15676400 | 0.05230500  | C | -0.14920000 | -2.73792500 | 1.20687500  |
| C | 1.00847400  | 3.59168800 | 0.16042100  | H | 5.28147600  | -2.40438000 | 1.30554200  | H | 0.60199100  | -0.97224500 | 2.16320400  |
| C | -0.02562700 | 4.53391500 | 0.11756600  | H | 7.50496400  | 0.28134700  | -1.18929100 | C | -0.14913900 | -2.73776300 | -1.20734900 |
| C | -1.36191300 | 4.14240200 | 0.06815000  | O | -7.39746000 | -2.17923200 | -0.25294800 | H | 0.60211300  | -0.97195300 | -2.16339400 |
| C | -2.62657400 | 0.82555900 | -0.00982700 | O | -0.07037300 | -3.56116700 | 2.35749400  | C | -0.42279400 | -3.38667100 | -0.00029100 |
|   |             |            |             | O | 0.92751700  | -3.07221200 | -2.34824200 | H | -0.83704800 | -4.39132900 | -0.00037000 |

|   |             |             |             |
|---|-------------|-------------|-------------|
| C | -1.86358200 | 1.24342900  | 0.00005300  |
| H | -1.55105900 | 0.20920800  | 0.00015100  |
| C | -3.20322800 | 1.51588100  | 0.00002400  |
| H | -3.52646500 | 2.55283600  | -0.00000200 |
| C | -4.27909000 | 0.56084800  | 0.00004500  |
| C | -4.08418900 | -0.84297100 | 0.00006600  |
| C | -5.60992600 | 1.03644300  | 0.00007900  |
| C | -5.15215700 | -1.71173500 | 0.00012400  |
| H | -3.08154800 | -1.25187000 | 0.00003900  |
| C | -6.68962700 | 0.17284800  | 0.00013300  |
| H | -5.78945800 | 2.10599900  | 0.00005500  |
| C | -6.46625600 | -1.21086600 | 0.00016700  |
| H | -5.00818500 | -2.78490100 | 0.00014300  |
| H | -7.70261300 | 0.56161300  | 0.00015000  |
| O | 7.33132500  | -2.18100300 | 0.00015400  |
| O | -0.38807000 | -3.30931900 | -2.41730000 |
| O | -0.38819000 | -3.30966300 | 2.41672800  |
| O | -0.20119200 | 5.86552400  | -0.00017700 |
| O | -7.46298800 | -2.11851700 | 0.00022800  |
| O | 2.81564900  | 2.20439400  | 0.00010900  |
| H | 8.13212700  | -1.64220400 | 0.00016200  |
| H | -0.72441600 | -4.20700800 | 2.31499500  |
| H | -1.14270400 | 6.07636500  | -0.00025900 |
| H | -0.72425100 | -4.20669800 | -2.31572100 |
| H | -8.32713700 | -1.68915800 | 0.00025700  |

**Cartesian coordinates RAF TS 4b**

|   |             |             |             |
|---|-------------|-------------|-------------|
| C | -2.32824600 | 2.72425300  | -0.06509600 |
| C | -1.23803500 | 1.83949900  | 0.01666900  |
| C | 0.07395200  | 2.38452900  | 0.07658400  |
| C | 0.17790000  | 3.79001100  | 0.03710700  |
| C | -0.93740500 | 4.62303100  | -0.05369700 |
| C | -2.23263500 | 4.10104400  | -0.10504700 |
| C | -3.18349700 | 0.68479300  | -0.05943600 |
| C | -1.82185100 | 0.51316600  | 0.01373700  |
| H | 1.15695000  | 4.25105000  | 0.10887200  |
| H | -3.09782900 | 4.74690200  | -0.16706500 |
| C | -4.33476800 | -0.21008300 | -0.09771900 |
| C | -5.63402900 | 0.32117100  | -0.02320600 |
| C | -4.20369000 | -1.60685600 | -0.21405400 |

|   |             |             |             |
|---|-------------|-------------|-------------|
| C | -6.75168000 | -0.50294100 | -0.05649600 |
| H | -5.76755600 | 1.39110800  | 0.06252400  |
| C | -5.31620300 | -2.43292800 | -0.24869800 |
| H | -3.22302900 | -2.05483400 | -0.28424600 |
| C | -6.59798200 | -1.88548900 | -0.16838900 |
| H | -7.74501100 | -0.06797600 | 0.00479500  |
| H | -5.20788100 | -3.50671800 | -0.34068300 |
| C | -1.09116200 | -0.78056500 | 0.06840800  |
| C | -0.59119800 | -1.34179200 | -1.11015600 |
| C | -0.88553000 | -1.41867000 | 1.29536400  |
| C | 0.11258100  | -2.54418500 | -1.05691200 |
| H | -0.73744500 | -0.85642800 | -2.06630800 |
| C | -0.18262800 | -2.62247000 | 1.33389600  |
| H | -1.26494200 | -0.99571600 | 2.21646000  |
| C | 0.31985400  | -3.19342900 | 0.16262200  |
| H | 0.86409600  | -4.13378600 | 0.19892200  |
| C | 1.23752300  | 1.52736900  | 0.19905600  |
| H | 1.02484900  | 0.48601600  | 0.39816400  |
| C | 2.54355800  | 1.90502900  | 0.07799400  |
| H | 2.76765300  | 2.93414400  | -0.18945000 |
| C | 3.69333700  | 1.06565400  | 0.24371800  |
| C | 3.62223400  | -0.29063000 | 0.68550100  |
| C | 4.98836600  | 1.60612900  | -0.01094600 |
| C | 4.74443700  | -1.05328200 | 0.83040700  |
| H | 2.66085700  | -0.71995200 | 0.93927200  |
| C | 6.12156300  | 0.85660300  | 0.12154800  |
| H | 5.06636500  | 2.64615100  | -0.31044900 |
| C | 6.03643900  | -0.54171200 | 0.46366900  |
| H | 4.69828500  | -2.07198100 | 1.19475600  |
| H | 7.10181800  | 1.27907300  | -0.06609700 |
| O | -7.65694400 | -2.74840800 | -0.20631500 |
| O | -0.01401400 | -3.20793500 | 2.55784600  |
| O | 0.57278700  | -3.04938400 | -2.23856200 |
| O | -0.82650100 | 5.98811200  | -0.08336700 |
| O | 7.10810000  | -1.16777000 | 1.02578600  |
| O | -3.49709300 | 2.03221200  | -0.10514700 |
| H | -8.48261000 | -2.25634100 | -0.14562000 |
| H | 1.11160800  | -3.83173000 | -2.08136100 |
| H | 0.10163600  | 6.24095900  | -0.04443400 |

**Cartesian coordinates RAF TS 7b**

|   |             |             |             |
|---|-------------|-------------|-------------|
| C | -1.70904100 | 2.72340000  | -0.18775500 |
| C | -0.75072500 | 1.69976600  | -0.10640200 |
| C | 0.62928200  | 2.06041600  | -0.10892400 |
| C | 0.92433000  | 3.44037300  | -0.18654900 |
| C | -0.06941100 | 4.41407100  | -0.25824200 |
| C | -1.42622600 | 4.07368200  | -0.26660400 |
| C | -2.83653500 | 0.82309700  | -0.10104200 |
| C | -1.50755900 | 0.46877400  | -0.05593600 |
| H | 1.95836700  | 3.75634300  | -0.11435700 |
| H | -2.19648900 | 4.83115600  | -0.31706800 |
| C | -4.09955900 | 0.09389300  | -0.08462600 |
| C | -5.31323300 | 0.80148300  | -0.03127700 |
| C | -4.16306500 | -1.31188900 | -0.12649000 |
| C | -6.53357000 | 0.13804100  | -0.01602200 |
| H | -5.29795300 | 1.88255200  | -0.00048800 |
| C | -5.37866500 | -1.97797900 | -0.11211200 |
| H | -3.25418200 | -1.89371000 | -0.17559400 |
| C | -6.57223800 | -1.25630200 | -0.05567000 |
| H | -7.45708400 | 0.70812000  | 0.02739700  |
| H | -5.41951900 | -3.05985600 | -0.14631800 |
| C | -0.95863300 | -0.91050000 | 0.02407200  |
| C | -0.59953200 | -1.58146000 | -1.14855100 |
| C | -0.79451300 | -1.52817600 | 1.26755200  |
| C | -0.08531300 | -2.87444500 | -1.07195500 |
| H | -0.71730900 | -1.11435900 | -2.11761800 |
| C | -0.28062700 | -2.82273300 | 1.32911100  |
| H | -1.06705500 | -1.02085200 | 2.18384400  |
| C | 0.07580400  | -3.50488800 | 0.16398100  |
| H | 0.47311400  | -4.51549500 | 0.21772500  |
| C | 1.67037400  | 1.07703700  | -0.02094700 |
| H | 1.37819300  | 0.08652400  | 0.30043700  |
| C | 3.02033500  | 1.30759300  | -0.30134500 |
| H | 3.25923600  | 2.16052000  | -0.92699800 |

|   |             |             |             |
|---|-------------|-------------|-------------|
| C | 4.01406700  | 0.22707600  | -0.34378500 |
| C | 3.91919500  | -0.91683000 | 0.46311000  |
| C | 5.13706000  | 0.34416800  | -1.18109800 |
| C | 4.89359600  | -1.90971600 | 0.41967300  |
| H | 3.08420100  | -1.03175300 | 1.14330000  |
| C | 6.11084200  | -0.64180100 | -1.23780400 |
| H | 5.24307600  | 1.22704000  | -1.80245400 |
| C | 5.98987500  | -1.77764600 | -0.43443200 |
| H | 4.80408400  | -2.78444000 | 1.05768400  |
| H | 6.96893900  | -0.54797700 | -1.89214100 |
| O | -7.74035100 | -1.96649400 | -0.04323500 |
| O | -0.14487100 | -3.38356300 | 2.56938900  |
| O | 0.24269600  | -3.48740200 | -2.24877800 |
| O | 0.22661100  | 5.75033400  | -0.30776900 |
| O | 6.97757400  | -2.72011300 | -0.52185200 |
| O | -2.96349200 | 2.19769300  | -0.18074100 |
| H | -8.48955000 | -1.36269900 | -0.00309700 |
| H | 0.60158300  | -4.36424600 | -2.07793500 |
| H | 1.17941600  | 5.87171700  | -0.23703300 |
| H | 0.18631900  | -4.28419000 | 2.49138300  |
| H | 6.79810200  | -3.43963300 | 0.09242000  |
| O | 3.67268400  | 2.40793900  | 1.21422500  |
| O | 3.89679200  | 1.64466700  | 2.35629600  |
| H | 4.78547500  | 1.27973200  | 2.21703600  |

**Cartesian coordinates RAF TS 11a**

|   |             |             |             |
|---|-------------|-------------|-------------|
| C | 1.53771100  | 3.06959900  | -0.23403300 |
| C | 0.53652100  | 2.08185300  | -0.20477500 |
| C | -0.81659100 | 2.50425700  | -0.22761400 |
| C | -1.05479800 | 3.88533900  | -0.29371000 |
| C | -0.02044400 | 4.82848600  | -0.31736100 |
| C | 1.31436500  | 4.43365400  | -0.28942400 |
| C | 2.58855500  | 1.13159800  | -0.09416700 |
| C | 1.25190500  | 0.82022300  | -0.09540500 |
| H | -2.07954800 | 4.23426200  | -0.37048100 |
| H | 2.11884000  | 5.15594800  | -0.31461300 |
| C | 3.81843800  | 0.34960500  | -0.01344400 |
| C | 5.00334700  | 0.95380600  | 0.43756000  |
| C | 3.87091600  | -1.00425300 | -0.39101500 |
| C | 6.18753300  | 0.23285600  | 0.52658900  |

|   |             |             |             |
|---|-------------|-------------|-------------|
| H | 4.99343300  | 1.99751800  | 0.72381300  |
| C | 5.05022500  | -1.72848400 | -0.30316700 |
| H | 2.98651700  | -1.49345900 | -0.77601000 |
| C | 6.21466800  | -1.11402200 | 0.16051200  |
| H | 7.09107900  | 0.71925700  | 0.88249900  |
| H | 5.08789400  | -2.76882200 | -0.60218200 |
| C | 0.70650000  | -0.55034100 | 0.10088700  |
| C | 0.05090391  | -1.17376638 | -0.99189237 |
| C | 0.79825665  | -1.20145418 | 1.30296176  |
| C | -0.52970783 | -2.46042340 | -0.85074743 |
| H | -0.01718755 | -0.67256518 | -1.94836664 |
| C | 0.22329065  | -2.57113418 | 1.52208136  |
| H | 1.24526808  | -0.72972220 | 2.17075278  |
| C | -0.48248570 | -3.13697881 | 0.32888211  |
| H | -0.88822674 | -4.13525796 | 0.44130029  |
| C | -1.93095000 | 1.55520200  | -0.21568400 |
| H | -1.71711300 | 0.57809100  | -0.63176800 |
| C | -3.16086500 | 1.78542200  | 0.28154900  |
| H | -3.34632200 | 2.71454700  | 0.81597200  |
| C | -4.29159000 | 0.85594000  | 0.22157800  |
| C | -4.42313400 | -0.11586200 | -0.78366200 |
| C | -5.30384200 | 0.91768800  | 1.19560000  |
| C | -5.48512600 | -1.01245200 | -0.79252000 |
| H | -3.70804600 | -0.14242100 | -1.59920900 |
| C | -6.36950900 | 0.02912500  | 1.19909000  |
| H | -5.24108500 | 1.66880200  | 1.97612900  |
| C | -6.45846400 | -0.94924100 | 0.20733900  |
| H | -5.56583400 | -1.75027100 | -1.58532800 |
| H | -7.13806600 | 0.07690800  | 1.96098500  |
| O | 7.34717700  | -1.87636000 | 0.22656200  |
| O | 1.19703338  | -3.52097092 | 1.95362733  |
| O | -1.11860738 | -2.95559381 | -1.98554085 |
| O | -0.26998000 | 6.17406400  | -0.38995200 |
| O | -7.52625800 | -1.80145400 | 0.25410500  |
| O | 2.77128000  | 2.49905900  | -0.17725300 |
| H | 8.08255500  | -1.34309900 | 0.54643200  |
| H | -1.45012687 | -3.84432359 | -1.81755200 |
| H | -1.22034700 | 6.32728600  | -0.39874500 |
| H | 2.07512628  | -3.13786548 | 1.86052252  |

**Cartesian coordinates RAF TS 8b**

|   |             |             |             |
|---|-------------|-------------|-------------|
| C | 1.68559700  | 2.74021400  | -0.20727200 |
| C | 0.70439300  | 1.74479200  | -0.05742100 |
| C | -0.64484700 | 2.14997600  | 0.04826000  |
| C | -0.91368900 | 3.52258600  | -0.00469800 |
| C | 0.10018100  | 4.47697900  | -0.15533200 |
| C | 1.43620500  | 4.09946500  | -0.26300900 |
| C | 2.75729500  | 0.80541500  | -0.19406700 |
| C | 1.43005000  | 0.48826000  | -0.05362500 |
| H | -1.93591300 | 3.86268900  | 0.12427500  |
| H | 2.22308100  | 4.83367300  | -0.37047500 |
| C | 3.99675400  | 0.03691700  | -0.26092800 |
| C | 5.23160000  | 0.68639300  | -0.09758900 |
| C | 4.01099300  | -1.35014600 | -0.49660200 |
| C | 6.42802500  | -0.01815000 | -0.15509200 |
| H | 5.25218500  | 1.75360800  | 0.07889100  |
| C | 5.20220600  | -2.05759400 | -0.55450400 |
| H | 3.08232500  | -1.88212700 | -0.64751900 |
| C | 6.41835400  | -1.39503600 | -0.38105100 |
| H | 7.37012300  | 0.50585500  | -0.02201300 |
| H | 5.20654900  | -3.12471900 | -0.74047500 |
| C | 0.85960400  | -0.87573600 | 0.09442000  |
| C | 0.90246800  | -1.51707600 | 1.33507500  |
| C | 0.28492400  | -1.51540900 | -1.00957200 |
| C | 0.38118100  | -2.80367600 | 1.46293800  |
| H | 1.33573800  | -1.03167500 | 2.19950500  |
| C | -0.23341500 | -2.80069200 | -0.86727000 |
| H | 0.24551700  | -1.03243800 | -1.97739300 |
| C | -0.18830100 | -3.45473900 | 0.36628000  |
| H | -0.58756800 | -4.46077400 | 0.47053400  |
| C | -1.74431500 | 1.18732400  | 0.24645000  |
| H | -1.44325700 | 0.20225900  | 0.57295400  |
| C | -2.95166100 | 1.31394000  | -0.44050400 |
| H | -3.13363200 | 2.24378800  | -0.97054700 |
| C | -4.02055800 | 0.35327600  | -0.48178900 |

C -3.97967100 -0.89787100 0.17656400  
 C -5.19026000 0.65331800 -1.22206000  
 C -5.04297900 -1.78399500 0.10016800  
 H -3.11314700 -1.17133800 0.76341100  
 C -6.25277900 -0.22799000 -1.30460800  
 H -5.25124600 1.60440900 -1.74049600  
 C -6.18442900 -1.45604200 -0.63927700  
 H -4.99114900 -2.73693300 0.61944200  
 H -7.14177100 0.01292700 -1.87470200  
 O 7.56157400 -2.14341400 -0.44729100  
 O -0.77265900 -3.38544700 -1.98045100  
 O 0.45703300 -3.38962300 2.69563800  
 O -0.17211500 5.82031000 -0.19132500  
 O -7.25932600 -2.29100000 -0.74616100  
 O 2.92099600 2.17779000 -0.28663000  
 H 8.32949200 -1.57756400 -0.31517800  
 H 0.06777800 -4.26967400 2.66891600  
 H -1.11514700 5.96153300 -0.05938500  
 H -1.08750300 -4.27042500 -1.76979300  
 H -7.10232500 -3.09484000 -0.23935000  
 O -2.21178400 1.73544000 2.06845400  
 O -2.93133600 0.72594100 2.71811400  
 H -3.84675800 1.04356200 2.68329800

**Cartesian coordinates RAF TS 7a**

C -1.42473100 2.69544400 -0.14945000  
 C -0.39902500 1.71580300 -0.17508300  
 C 0.95412700 2.15234000 -0.30666400  
 C 1.15923800 3.53384300 -0.43589000  
 C 0.10850200 4.45674600 -0.40542400  
 C -1.22280400 4.05049300 -0.25279200  
 C -2.43999200 0.75886100 0.19100700  
 C -1.05569000 0.46547100 -0.01530700  
 H 2.16639700 3.90645200 -0.58998900  
 H -2.03124700 4.76760000 -0.22139300  
 C -3.62202600 -0.07232500 -0.10158900  
 C -4.75176400 0.50268200 -0.69697300  
 C -3.66549700 -1.43861000 0.22289900  
 C -5.87936300 -0.26174000 -0.98092600  
 H -4.74759400 1.55620900 -0.94133700

C -4.78618900 -2.20596100 -0.05864900  
 H -2.82021400 -1.90197100 0.71261000  
 C -5.89894900 -1.61987500 -0.66630000  
 H -6.74384600 0.20333700 -1.44571700  
 H -4.81785000 -3.25912000 0.19284600  
 C -0.45763600 -0.89079200 0.02276300  
 C -0.16599400 -1.55469300 -1.17370600  
 C -0.18976400 -1.49728000 1.25348800  
 C 0.39199800 -2.83078600 -1.13047100  
 H -0.37775200 -1.10085400 -2.13321000  
 C 0.37270900 -2.77232500 1.27840900  
 H -0.42447100 -0.99314200 2.18168300  
 C 0.66655900 -3.44774100 0.09129600  
 H 1.09986100 -4.44466700 0.11857200  
 C 2.06431800 1.20599000 -0.30598500  
 H 1.80053700 0.17538300 -0.50603200  
 C 3.35484200 1.50734400 -0.05002400  
 H 3.60665100 2.52579500 0.23553000  
 C 4.49222800 0.59052400 -0.07247800  
 C 4.42301300 -0.72138900 -0.57344000  
 C 5.73518000 1.02603600 0.42307100  
 C 5.53281900 -1.55481900 -0.56659400  
 H 3.49388500 -1.09705300 -0.98492000  
 C 6.85180500 0.20220700 0.43583000  
 H 5.82264200 2.03527700 0.81213000  
 C 6.75330600 -1.09737400 -0.06004300  
 H 5.45585600 -2.56274600 -0.96479700  
 H 7.80225400 0.54900200 0.82271200  
 O -6.97526600 -2.42435200 -0.92023700  
 O 0.61434000 -3.32461300 2.50519300  
 O 0.65519200 -3.44062500 -2.32790800  
 O 0.32516300 5.79863000 -0.53583200  
 O 7.87873500 -1.87411900 -0.03284300  
 O -2.64306700 2.11110200 -0.01050300  
 H -7.67694200 -1.90974200 -1.33295300  
 H 0.98118000 -4.33402400 -2.17813200  
 H 1.26910600 5.97037200 -0.61989900  
 H 1.01922400 -4.19229500 2.40500900  
 H 7.68699900 -2.74027900 -0.40719400

**Cartesian coordinates RAF TS 11b**

C 1.63327200 2.46068300 -0.43848400  
 C 0.61956100 1.47286000 -0.36299600  
 C -0.75447700 1.88115300 -0.49266300  
 C -0.98834400 3.22630500 -0.65344500  
 C 0.05220700 4.23089000 -0.56613200  
 C 1.42208000 3.79989100 -0.59495900  
 C 2.65777300 0.51425900 -0.18411400  
 C 1.29821700 0.22949200 -0.19271600  
 H -1.99790500 3.58159400 -0.82335800  
 H 2.21639500 4.52916500 -0.67032700  
 C 3.86592000 -0.27898800 -0.04285000  
 C 5.12056700 0.31171000 -0.28551500  
 C 3.84190300 -1.63303600 0.34817500  
 C 6.29461100 -0.41650800 -0.15424700  
 H 5.17037900 1.35046000 -0.58318000  
 C 5.01199200 -2.36182600 0.48249300  
 H 2.89999500 -2.11825700 0.55949900  
 C 6.24628200 -1.75852400 0.22927100  
 H 7.25057500 0.05994500 -0.35079000  
 H 4.98800300 -3.40054400 0.78845700  
 C 0.67501600 -1.11320100 -0.05834000  
 C 0.13381500 -1.50477600 1.16853400  
 C 0.62161500 -1.97156800 -1.16070800  
 C -0.45720800 -2.76153900 1.28914600  
 H 0.15854500 -0.84647200 2.02697600  
 C 0.02798200 -3.22525300 -1.02509100  
 H 1.03556800 -1.68128800 -2.11766100  
 C -0.51217900 -3.63037300 0.19703400  
 H -0.97096100 -4.61091600 0.29728100  
 C -1.84925900 0.90407400 -0.50549700  
 H -1.61503900 -0.07194200 -0.91560600  
 C -3.08455400 1.14263500 -0.02859200  
 H -3.26578900 2.09005400 0.47363300  
 C -4.23167800 0.23320700 -0.06711400  
 C -4.28204500 -0.91283200 -0.87775300

|   |             |             |             |
|---|-------------|-------------|-------------|
| C | -5.35468300 | 0.50675300  | 0.73369600  |
| C | -5.38932700 | -1.75134200 | -0.87426200 |
| H | -3.45310400 | -1.14760400 | -1.53500300 |
| C | -6.46718800 | -0.32356500 | 0.74737500  |
| H | -5.34882900 | 1.38936700  | 1.36477200  |
| C | -6.48687300 | -1.46095300 | -0.05889500 |
| H | -5.40890000 | -2.62683100 | -1.51759100 |
| H | -7.32517700 | -0.10339700 | 1.37089400  |
| O | 7.36503500  | -2.52678200 | 0.37597000  |
| O | 0.00050700  | -4.02724900 | -2.13308500 |
| O | -0.96450700 | -3.09714100 | 2.51194200  |
| O | -0.16397300 | 5.46096500  | -1.13429200 |
| O | -7.60569600 | -2.24901200 | -0.01957300 |
| O | 2.86245000  | 1.86810600  | -0.33837600 |
| H | 8.15033400  | -2.00470300 | 0.17965000  |
| H | -1.39063000 | -3.95950900 | 2.47121800  |
| H | -0.99227000 | 5.81569200  | -0.78616500 |
| H | -0.41205500 | -4.87085700 | -1.92090400 |
| H | -7.50956000 | -2.98110000 | -0.63748500 |
| O | -0.17584700 | 4.85059900  | 1.15947100  |
| O | -0.18089700 | 3.83418300  | 2.13358100  |
| H | 0.73386800  | 3.84002700  | 2.45249100  |

Cartesian coordinates RAF TS 10b

|   |             |             |             |
|---|-------------|-------------|-------------|
| C | 1.48872700  | 2.55946900  | -0.36965400 |
| C | 0.57477100  | 1.49881300  | -0.24533700 |
| C | -0.81071000 | 1.77262500  | -0.31239200 |
| C | -1.19509300 | 3.16484000  | -0.37330900 |
| C | -0.19173100 | 4.19292500  | -0.53583100 |
| C | 1.15335000  | 3.90578800  | -0.52186100 |
| C | 2.70098300  | 0.72178100  | -0.15721100 |
| C | 1.39439300  | 0.30686200  | -0.11205900 |
| H | -2.15084000 | 3.38156100  | -0.83594900 |
| H | 1.89977300  | 4.68143500  | -0.62690700 |
| C | 3.99886900  | 0.06425900  | -0.05905900 |
| C | 5.16576400  | 0.76199900  | -0.41419600 |
| C | 4.13949000  | -1.25926200 | 0.39856300  |
| C | 6.41632700  | 0.16263600  | -0.32916000 |
| H | 5.09057100  | 1.78357500  | -0.76226300 |
| C | 5.38511100  | -1.86138800 | 0.48501300  |

|   |             |             |             |
|---|-------------|-------------|-------------|
| H | 3.26747400  | -1.82180200 | 0.70057200  |
| C | 6.53155900  | -1.15393900 | 0.11874500  |
| H | 7.30332200  | 0.72179700  | -0.61258500 |
| H | 5.48691000  | -2.87894800 | 0.84205500  |
| C | 0.91663000  | -1.08946800 | 0.05688900  |
| C | 0.41919500  | -1.50573900 | 1.29568800  |
| C | 0.95724800  | -1.97967100 | -1.02062900 |
| C | -0.02836900 | -2.81592800 | 1.45270200  |
| H | 0.37462500  | -0.82621100 | 2.13679600  |
| C | 0.50797400  | -3.28788600 | -0.84862700 |
| H | 1.33834800  | -1.67195900 | -1.98561400 |
| C | 0.01390700  | -3.71631400 | 0.38512100  |
| H | -0.33220100 | -4.73889600 | 0.51414600  |
| C | -1.81331600 | 0.73928500  | -0.33660000 |
| H | -1.44548600 | -0.26767400 | -0.48936900 |
| C | -3.14741100 | 0.92984300  | -0.16499600 |
| H | -3.49703300 | 1.92620100  | 0.08651700  |
| C | -4.18516600 | -0.08984600 | -0.22331300 |
| C | -3.95844800 | -1.41358500 | -0.64468700 |
| C | -5.49939200 | 0.24910500  | 0.15521800  |
| C | -4.98512300 | -2.34630300 | -0.67592800 |
| H | -2.96924600 | -1.71986600 | -0.96296700 |
| C | -6.53307600 | -0.67510200 | 0.12956300  |
| H | -5.70551600 | 1.26248200  | 0.48308600  |
| C | -6.27834100 | -1.98191500 | -0.28714900 |
| H | -4.78666800 | -3.36025300 | -1.01209500 |
| H | -7.53857600 | -0.40251700 | 0.42622300  |
| O | 7.73256500  | -1.79868400 | 0.22450800  |
| O | 0.57277200  | -4.11940200 | -1.93338000 |
| O | -0.49598000 | -3.17321700 | 2.68604200  |
| O | -0.60195100 | 5.47804600  | -0.69612700 |
| O | -7.32738200 | -2.85916000 | -0.30124900 |
| O | 2.76113000  | 2.09996400  | -0.32191100 |
| H | 8.44468200  | -1.20956100 | -0.04618500 |
| H | -0.79416700 | -4.08854400 | 2.67652000  |
| H | -1.48757100 | 5.56036500  | -0.30438700 |
| H | 0.25817300  | -4.99784900 | -1.69624000 |
| H | -7.03063200 | -3.71845600 | -0.61869400 |
| O | -1.88050300 | 3.50995600  | 1.34065100  |

Cartesian coordinates RAF TS 12b

|   |             |             |             |
|---|-------------|-------------|-------------|
| C | 1.57715300  | 2.39060800  | -0.41610200 |
| C | 0.54425600  | 1.46508100  | -0.34061200 |
| C | -0.81123200 | 1.93368800  | -0.40574100 |
| C | -0.98060200 | 3.32754600  | -0.61451400 |
| C | 0.07547100  | 4.20926100  | -0.70025100 |
| C | 1.42897600  | 3.79570300  | -0.45821500 |
| C | 2.54914700  | 0.41931500  | -0.22717500 |
| C | 1.19570100  | 0.17350400  | -0.21724800 |
| H | -1.98324400 | 3.71919600  | -0.74807100 |
| H | 2.23536000  | 4.42019900  | -0.82218300 |
| C | 3.75255600  | -0.40512300 | -0.14326400 |
| C | 5.00546800  | 0.20758900  | 0.02842100  |
| C | 3.71661700  | -1.80858100 | -0.23297400 |
| C | 6.16950100  | -0.54603600 | 0.11326400  |
| H | 5.06651000  | 1.28549900  | 0.09790600  |
| C | 4.87582400  | -2.56509300 | -0.14812100 |
| H | 2.77503000  | -2.31819200 | -0.37807000 |
| C | 6.10999400  | -1.93754100 | 0.02667000  |
| H | 7.12534100  | -0.04827200 | 0.24858700  |
| H | 4.84071500  | -3.64528800 | -0.22070600 |
| C | 0.54821200  | -1.16011700 | -0.10262100 |
| C | 0.33890500  | -1.72715600 | 1.15711100  |
| C | 0.15573600  | -1.84689200 | -1.25668200 |
| C | -0.25420000 | -2.98494500 | 1.25760800  |
| H | 0.63568300  | -1.20876200 | 2.05936900  |
| C | -0.43531800 | -3.10379100 | -1.14235100 |
| H | 0.31418800  | -1.42299000 | -2.23988600 |
| C | -0.64484200 | -3.68201000 | 0.11214100  |
| H | -1.10137100 | -4.66524400 | 0.19547600  |
| C | -1.92688300 | 1.03171700  | -0.27907000 |
| H | -1.67233200 | -0.01953300 | -0.24777500 |
| C | -3.23771700 | 1.37758900  | -0.17330400 |
| H | -3.50185400 | 2.43109400  | -0.14771300 |
| C | -4.37457900 | 0.47612900  | -0.06102200 |
| C | -4.27502000 | -0.92574800 | -0.14834300 |
| C | -5.65977400 | 1.01695600  | 0.14465900  |

|   |             |             |             |   |             |             |             |   |            |            |            |
|---|-------------|-------------|-------------|---|-------------|-------------|-------------|---|------------|------------|------------|
| C | -5.39434100 | -1.73644800 | -0.02844900 | C | -6.83585400 | -0.89808000 | -0.01036900 | H | 7.52414500 | 1.47182000 | 1.09912000 |
| H | -3.31253700 | -1.39326900 | -0.31716500 | H | -7.58401000 | 1.07412900  | 0.43642600  |   |            |            |            |
| C | -6.78540900 | 0.21632100  | 0.26535800  | H | -5.81276200 | -2.72351400 | -0.46927600 |   |            |            |            |
| H | -5.77148900 | 2.09407500  | 0.21377900  | C | -1.22730800 | -0.89151000 | -0.00438600 |   |            |            |            |
| C | -6.65627700 | -1.17015500 | 0.17993600  | C | -0.83080400 | -1.51929800 | -1.18952100 |   |            |            |            |
| H | -5.29169600 | -2.81562100 | -0.10121200 | C | -1.19343200 | -1.58922300 | 1.20643800  |   |            |            |            |
| H | -7.76676500 | 0.64610200  | 0.42505300  | C | -0.40827400 | -2.84679300 | -1.15727000 |   |            |            |            |
| O | 7.21917300  | -2.73333600 | 0.10326400  | H | -0.85087300 | -0.99271900 | -2.13481000 |   |            |            |            |
| O | -0.79122900 | -3.73570200 | -2.30196900 | C | -0.77061200 | -2.91767300 | 1.22411200  |   |            |            |            |
| O | -0.42843000 | -3.49380700 | 2.51374900  | H | -1.49878600 | -1.11745300 | 2.13124100  |   |            |            |            |
| O | -0.07839800 | 5.53441300  | -0.96752600 | C | -0.37512900 | -3.55550100 | 0.04638300  |   |            |            |            |
| O | -7.79179300 | -1.92151100 | 0.30246400  | H | -0.04898300 | -4.59252400 | 0.06467600  |   |            |            |            |
| O | 2.78365000  | 1.77335900  | -0.34172400 | C | 1.53056900  | 0.92271800  | 0.00112600  |   |            |            |            |
| H | 8.00456400  | -2.18843900 | 0.22036100  | H | 1.15138900  | -0.05330600 | 0.27491600  |   |            |            |            |
| H | -0.83925900 | -4.36329500 | 2.46750600  | C | 2.85586700  | 1.05095100  | -0.28496600 |   |            |            |            |
| H | -1.01540500 | 5.75553000  | -1.00457900 | H | 3.22460700  | 2.01330300  | -0.62584400 |   |            |            |            |
| H | -1.15352700 | -4.60639500 | -2.10809400 | C | 3.85899200  | 0.02706000  | -0.20078100 |   |            |            |            |
| H | -7.57620500 | -2.85651200 | 0.22190400  | C | 3.63549000  | -1.26244800 | 0.31566500  |   |            |            |            |
| O | 1.78059000  | 4.42880800  | 1.28502700  | C | 5.21377600  | 0.37011100  | -0.59265300 |   |            |            |            |
| O | 0.92186400  | 3.83422000  | 2.22247700  | C | 4.64218100  | -2.20737700 | 0.35342900  |   |            |            |            |
| H | 1.42093400  | 3.06033400  | 2.52475400  | H | 2.65469800  | -1.53197600 | 0.68835900  |   |            |            |            |

### Cartesian coordinates RAF TS 2b

|   |             |             |             |   |             |             |             |   |             |             |             |
|---|-------------|-------------|-------------|---|-------------|-------------|-------------|---|-------------|-------------|-------------|
| C | -1.74816100 | 2.79186400  | -0.05850400 | C | 6.20303600  | -0.66256900 | -0.66455200 | H | 5.32818600  | 1.20063200  | -1.27935000 |
| C | -0.84991600 | 1.71012700  | -0.04387700 | H | 5.32818600  | 1.20063200  | -1.27935000 | C | 5.93258300  | -1.90619200 | -0.15715500 |
| C | 0.54363500  | 1.98815500  | -0.04246500 | H | 4.44722600  | -3.19260300 | 0.76728500  | H | 4.44722600  | -3.19260300 | 0.76728500  |
| C | 0.91932300  | 3.34532800  | -0.06053300 | H | 7.18079500  | -0.44930600 | -1.07760500 | H | 7.18079500  | -0.44930600 | -1.07760500 |
| C | -0.01452800 | 4.38282400  | -0.08267500 | O | -8.04383400 | -1.53814000 | -0.01389700 | O | -8.04383400 | -1.53814000 | -0.01389700 |
| C | -1.38709400 | 4.12491700  | -0.08181200 | O | -0.76188600 | -3.55470600 | 2.43412000  | O | -0.76188600 | -3.55470600 | 2.43412000  |
| C | -2.98522800 | 0.95925200  | -0.03612300 | O | -0.03943000 | -3.41440600 | -2.34475900 | O | -0.03943000 | -3.41440600 | -2.34475900 |
| C | -1.68238100 | 0.52327100  | -0.03219000 | O | 0.36316700  | 5.69920400  | -0.08902900 | O | 0.36316700  | 5.69920400  | -0.08902900 |
| H | 1.97219700  | 3.60202000  | -0.01615400 | O | 6.92382800  | -2.85053000 | -0.17061500 | O | 6.92382800  | -2.85053000 | -0.17061500 |
| H | -2.11148400 | 4.92787700  | -0.08802100 | O | -3.03128700 | 2.34211300  | -0.04985700 | O | -3.03128700 | 2.34211300  | -0.04985700 |
| C | -4.28966500 | 0.30551300  | -0.02818700 | H | -8.74828700 | -0.90801800 | 0.17098700  | H | -8.74828700 | -0.90801800 | 0.17098700  |
| C | -5.44749400 | 1.06081600  | 0.22451000  | H | 0.23774200  | -4.32586800 | -2.20591000 | H | 0.23774200  | -4.32586800 | -2.20591000 |
| C | -4.44631200 | -1.07035400 | -0.27935600 | H | 1.32396000  | 5.76197000  | -0.07351400 | H | 1.32396000  | 5.76197000  | -0.07351400 |
| C | -6.70451400 | 0.46929100  | 0.23554400  | H | -0.47989000 | -4.46890100 | 2.32621300  | H | -0.47989000 | -4.46890100 | 2.32621300  |
| H | -5.35937100 | 2.12200600  | 0.41532000  | H | 6.57950600  | -3.69093400 | 0.14826500  | H | 6.57950600  | -3.69093400 | 0.14826500  |
| C | -5.69869400 | -1.66487700 | -0.27034600 | O | 5.65820500  | 1.43523300  | 0.85972300  | O | 5.65820500  | 1.43523300  | 0.85972300  |
| H | -3.58258000 | -1.68314700 | -0.49453800 | O | 6.90777000  | 2.04556900  | 0.61997600  | O | 6.90777000  | 2.04556900  | 0.61997600  |
